## RESEARCH ARTICLE

# Bacteriophage-encoded 24B\_1 molecule resembles herpesviral microRNAs and plays a crucial role in the development of both the virus and its host

Sylvia Bloch<sup>1</sup>✉, Natalia Lewandowska<sup>1</sup>✉, Joanna Zwolenkiewicz<sup>2</sup>, Paulina Mach<sup>1</sup>, Aleksandra Łukasiak<sup>1</sup>, Mikołaj Olejniczak<sup>2</sup>, Logan W. Donaldson<sup>3</sup>, Grzegorz Węgrzyn<sup>1</sup>, Bożena Nejman-Faleńczyk<sup>1</sup>\*

**1** Department of Molecular Biology, University of Gdansk, Gdansk, Poland, **2** Institute of Molecular Biology and Biotechnology, Adam Mickiewicz University in Poznan, Poznan, Poland, **3** Department of Biology, York University, Toronto, Canada

✉ These authors contributed equally to this work.

\* [bozena.nejman-falenczyk@ug.edu.pl](mailto:bozena.nejman-falenczyk@ug.edu.pl)

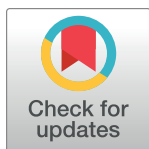

## OPEN ACCESS

**Citation:** Bloch S, Lewandowska N, Zwolenkiewicz J, Mach P, Łukasiak A, Olejniczak M, et al. (2023) Bacteriophage-encoded 24B\_1 molecule resembles herpesviral microRNAs and plays a crucial role in the development of both the virus and its host. PLoS ONE 18(12): e0296038. <https://doi.org/10.1371/journal.pone.0296038>

**Editor:** Rahul Shubhra Mandal, University of Pennsylvania Perelman School of Medicine, UNITED STATES

**Received:** July 24, 2023

**Accepted:** December 1, 2023

**Published:** December 20, 2023

**Copyright:** © 2023 Bloch et al. This is an open access article distributed under the terms of the [Creative Commons Attribution License](https://creativecommons.org/licenses/by/4.0/), which permits unrestricted use, distribution, and reproduction in any medium, provided the original author and source are credited.

**Data Availability Statement:** All relevant data are within the paper and its [Supporting Information](#) files.

**Funding:** This work was supported by National Science Center (Poland) (<https://www.ncn.gov.pl/en>) grant No. 2018/29/B/NZ1/00549 to GW, No. 2018/02/X/NZ1/02680 to BNF, No. 2018/31/B/NZ1/02612 to MO, and the Natural Sciences and Engineering Research Council of Canada (NSERC)

## Abstract

The 24B\_1 small non-coding RNA molecule has been identified in *Escherichia coli* after induction of Shiga toxin-converting bacteriophage Φ24<sub>B</sub>. In this work, we focused on its direct role during phage and bacterial host development. We observed that in many aspects, this phage sRNA resembles herpesviral microRNAs. Similar to microRNAs, the mature 24B\_1 is a short molecule, consisting of just 20 nucleotides. It is generated by cleaving the 80-nt long precursor transcript, and likely it undergoes a multi-step maturation process in which the Hfq protein plays an important role, as confirmed by demonstration of its binding to the 24B\_1 precursor, but not to the 24B\_1 mature form. Moreover, 24B\_1 plays a significant role in maintaining the prophage state and reprogramming the host's energy metabolism. We proved that overproduction of this molecule causes the opposite physiological effects to the mutant devoid of the 24B\_1 gene, and thus, favors the lysogenic pathway. Furthermore, the 24B\_1 overrepresentation significantly increases the efficiency of expression of phage genes coding for proteins CI, CII, and CIII which are engaged in the maintenance of the prophage. It seems that through binding to mRNA of the *sdhB* gene, coding for the succinate dehydrogenase subunit, the 24B\_1 alters the central carbon metabolism and causes a drop in the ATP intracellular level. Interestingly, a similar effect, called the Warburg switch, is caused by herpesviral microRNAs and it is observed in cancer cells. The advantage of the Warburg effect is still unclear, however, it was proposed that the metabolism of cancer cells, and all rapidly dividing cells, is adopted to convert nutrients such as glucose and glutamine faster and more efficiently into biomass. The availability of essential building blocks, such as nucleotides, amino acids, and lipids, is crucial for effective cell proliferation which in turn is essential for the prophage and its host to stay in the lysogenic state.

2018-05838 to LWD. The funders had no role in study design, data collection, and analysis, the decision to publish, or the preparation of the manuscript.

**Competing interests:** The authors have declared that no competing interests exist.

## Introduction

Shiga toxin-producing *Escherichia coli* (STEC) bacteria are highly harmful to humans as they contain lambdoid prophages (called Stx phages) bearing the *stx* genes coding for Shiga toxins, the major agents responsible for the development of severe diseases. Stx phages bear many similarities in the life cycle and genomic organization to bacteriophage  $\lambda$ , the most-investigated member of this family [1, 2]. The Stx phage lifecycle begins when the phage adsorbs to the surface of the host bacteria and injects its linear double-stranded DNA into the cell. At this stage, depending on the intracellular conditions, phage may develop according to one of two alternative pathways, lysogenic or lytic [3, 4]. When the lysogenic pathway is chosen, phage DNA is incorporated into *E. coli* genome (forming a prophage), replicated together with the bacterial genome, and then transmitted to daughter cells during cell division. The excision of the phage genome occurs following prophage induction. This may be caused by different factors like UV, antibiotics, or hydrogen peroxide that is naturally produced in the human body [5–9]. As a consequence, viral DNA starts to replicate separately from the host bacterial chromosome as an extrachromosomal element [10, 11]. This leads to the synthesis of phage structural and lysis proteins. In effect, the assembly of multiple new phage particles, disruption of the bacterial host cell, and release of large amounts of Shiga toxins and Stx progeny phages occur [12, 13].

The progressive production of Shiga toxins causes bloody diarrhea as the first symptom of human infection. Other symptoms like abdominal pain and vomiting may also occur. Symptoms of food poisoning maintain around 10 days, however, 15–20% of patients infected with these pathogens progress to severe complications such as hemolytic uremic syndrome, thrombocytopenia, or hemorrhagic colitis. Children under five years old and the elderly are most susceptible to severe complications with mortality as high as 87% [14–16]. The main problem of human infection by STEC is a lack of known effective treatment strategies. There is serious doubt of using antibiotics, as they are prophage inducers that indirectly stimulate the expression of genes coding for Shiga toxins and consequently, enhance the severity of disease symptoms [6, 16–18].

The severity of the infection and the development of complications depend on the amount of Shiga toxin produced by bacteria. Importantly, the expression of *stx* genes is tightly linked to lytic development which starts after prophage induction. Otherwise, during lysogeny, the majority of phage genes (including these coding for Shiga toxins) are suppressed. In general, the switch between lysogenic and lytic pathway is based on the activation and inactivation of the major phage repressor of the lytic development (called CI in the case of lambdoid phages). This DNA-binding repressor is involved in the inhibition of the transcription from the main phage promoters  $p_L$  and  $p_R$ . The binding of the repressor to the operator sites is a well-known mechanism of negative regulation that inhibits transcriptional initiation and thus suppresses the expression of the genes essential for the lytic cycle, synthesis of toxins, and phage lytic development at all. Before a phage enters the lytic pathway, repressors must be inactivated [19]. The best known mechanism responsible for the inactivation of the phage repressors in lambdoid phages involves the host SOS system that can be induced by physiological changes in the host cells, UV light irradiation, hydrogen peroxide treatment, or antibiotics. In most cases, the inducers of the SOS response cause DNA damage which results in the activation of the RecA protein and subsequent degradation of both the bacterial LexA protein and the phage-encoded CI repressor. The second mechanism to control the repressor activity uses phage-encoded antirepressor protein (frequently called Ant) which acts through the competitive binding with the repressor to the same operator-binding site. Some of the identified antirepressor genes are under the direct control of the LexA, however, some reports indicate that

also small non-coding RNAs may be involved in this regulation. For example, the Ant antirepressor synthesis is regulated during the development of bacteriophage P22 by the small anti-sense RNA named Sar. Notably, this sRNA molecule acts in *trans* by binding to the ribosome binding site of the Ant mRNA and inhibits Ant production at a post-transcriptional level [20, 21]. Similarly, in phage N15 which is a temperate virus of *E. coli* related to lambdoid phages, the antirepressor gene is negatively regulated by a small RNA, named CA [22].

Recently, our group discovered 24B\_1, a 20-nt microRNA-like molecule, after induction of Shiga toxin-converting bacteriophage  $\Phi$ 24<sub>B</sub> [23]. Importantly this molecule has been shown to stimulate the lysogenic pathway of phage lifecycle in *E. coli* bacteria. We speculated that 24B\_1 may act as a regulator of D<sub>ant</sub> antirepressor gene expression and thus indirectly control the activity of the repressor of the phage lytic cycle. Previously, we have tested aspects of the development of bacteriophage  $\Phi$ 24<sub>B</sub> bearing a deletion of the sequence encoding the 24B\_1 precursor molecule, that is located between genes *lom* and *vb\_24B\_43* of the  $\Phi$ 24<sub>B</sub> phage genome. The obtained results indicated that the lytic developmental pathway was more efficient in the mutant phage lacking the 24B\_1 molecule [23]. These promising results prompted us to take a closer look at the 24B\_1 role during the phage development in bacteria. In this report, we decided to analyze the influence of the overproduced 24B\_1 molecule on the development of the phage as well as its host. Manipulation of the phage lysogenic-lytic decision through microRNA-like particles offers a new way to understand developmental pathways and identify possible therapeutic interventions against pathogenic *E. coli* infections.

## Materials and methods

### Bacterial strains, bacteriophages, and plasmids

*E. coli* MG1655 strain and its derivatives employed in this work, are presented in Table 1. The deletion mutant, lacking the sequence of the small, microRNA-size, 24B\_1 molecule was constructed as described previously by [23] by using *E. coli* MG1655 ( $\Phi$ 24<sub>B</sub>) strain and the Quick and Easy *E. coli* Gene Deletion Kit (Gene Bridges, Heidelberg, Germany). Phages  $\Phi$ 24<sub>B</sub> [24] and  $\Phi$ 24<sub>B</sub>Δ24B\_1 [23] were from the collection of the Department of Molecular Biology of the University of Gdansk (Poland). Plasmid pUC18 (Thermo Fisher Scientific Inc., Waltham, MA, USA) was used as a control variant in all experiments presented in this work. Plasmid pUC18\_24B\_1, bearing the 189-nt region of  $\Phi$ 24<sub>B</sub> genome encompassing the identified 24B\_1 sequence, was described by us earlier [23]. The 24B\_1 transcript production from pUC18\_24B\_1 plasmid was also confirmed previously [23]. The plasmid bearing an additional copy of the 24B\_1 gene was incorporated into the *E. coli* MG1655 strain and used to overproduce the 24B\_1 molecule in cells infected with wild-type phage  $\Phi$ 24<sub>B</sub>.

### Media and growth conditions

For all experiments, *E. coli* bacteria were routinely cultured in the Luria-Bertani (LB) medium (EPRO, Władysławowo, Poland) at 37°C with aeration achieved by shaking. The LB broth, supplemented with 0.7% or 1.5% bacteriological agar (BTL, Łódź, Poland), was used as a top

**Table 1. *E. coli* MG1655 strain and its derivatives.**

| <i>E. coli</i> strains                  | Relevant genotype or description                                                                                                                              | References |
|-----------------------------------------|---------------------------------------------------------------------------------------------------------------------------------------------------------------|------------|
| MG1655                                  | F <sup>+</sup> $\lambda^-$ <i>ilvG rfb-50 rph-1</i>                                                                                                           | [25]       |
| MG1655 ( $\Phi$ 24 <sub>B</sub> )       | MG1655 bearing $\Phi$ 24 <sub>B</sub> prophage                                                                                                                | [26]       |
| MG1655 ( $\Phi$ 24 <sub>B</sub> Δ24B_1) | MG1655 bearing $\Phi$ 24 <sub>B</sub> prophage with deletion of the region encompassing the 80-nt long sequence of the predicted secondary structure of 24B_1 | [23]       |

<https://doi.org/10.1371/journal.pone.0296038.t001>

or bottom agar, respectively. The Petri dishes with the solid medium were incubated at 37°C for 20 h.

### Preparation of phage lysate

To obtain purified  $\Phi 24_B$  or  $\Phi 24_B\Delta 24B\_1$  particles, bacteria lysogenic for tested bacteriophages were grown in LB medium to an OD<sub>600</sub> of 0.1. Then, mitomycin C (EPRO, Władysławowo, Poland) was added to the flask to a final concentration of 1 µg/ml to provoke prophage induction. The mixture was incubated at 37°C on a rotary shaker at the rate of 200 RPM for about 18 h. Following the lysis of host cells, the lysate was treated with 4% chloroform for 15 minutes and cleared of bacterial debris by centrifugation (2000 x g, 10 min, 4°C). The supernatant containing phage virions was concentrated in the presence of 10% polyethylene glycol 8000 (PEG8000; EPRO, Władysławowo, Poland) on a magnetic stirrer at 4°C for about 20 h. The homogenous mixture was centrifuged (8000 x g, 20 min, 4°C) and the white phage pellet was resuspended in TM buffer (10 mM Tris-HCl, 10 mM MgSO<sub>4</sub>; pH 7.2). The suspension was extracted three times with chloroform (Chempur, Piekary Śląskie, Poland) after centrifugation (2000 x g, 10 min, 4°C). Finally, the upper aqueous layer with the virus particles was collected and the phage titer was determined according to the procedure described in the next section. The phage stock was stored at 4°C.

### Determination of the concentration of phage particles in the solution

Phage lysate titration was performed on the standard Petri dishes (Alchem, Toruń, Poland) according to the double overlay plaque assay described by [27]. The top layer was prepared by mixing 2 ml of a prewarmed soft LB agar (0.7%) with 1 ml of the indicator *E. coli* MG1655 strain culture. Following supplementation of the mixture with MgSO<sub>4</sub> (Chempur, Piekary Śląskie, Poland) and CaCl<sub>2</sub> (Chempur, Piekary Śląskie, Poland) to the final concentration of 10 mM, it was poured onto solid bottom LB agar (1.5%) with a sublethal concentration of chloramphenicol (2.5 µg/ml; EPRO, Władysławowo, Poland). Supplementation of the bottom LB agar with appropriate antibiotic was effective in increasing the size of plaques formed by Stx phages. To determine the number of virus particles per ml suspension (PFU/ml), serial 10-fold dilution was prepared in TM buffer (10 mM Tris-HCl, 10 mM MgSO<sub>4</sub>; pH 7.2). Then, 2.5 µl of each dilution was spotted onto the surface of the top LB agar. Petri dishes were incubated at 37°C for 20 h and the phage concentration was quantified on the basis of the number of plaques.

### Determination of lysis time of host bacteria

Host bacteria were cultivated in LB medium with 10 mM MgSO<sub>4</sub> (Chempur, Piekary Śląskie, Poland) and 10 mM CaCl<sub>2</sub> (Chempur, Piekary Śląskie, Poland) at 37°C to an OD<sub>600</sub> of 0.2. The phage stock solution was added to the flask with bacterial culture to an m.o.i. of 2. The lysis kinetics of infected bacteria were monitored spectrophotometrically by measuring OD<sub>600</sub> over a period of 300 min. Additionally, the number of bacterial cells per ml (CFU/ml) was determined. To calculate the number of viable bacterial cells after phage infection, 100 µl samples were harvested at appropriate times, and their serial 10-fold dilutions were prepared in 0.85% NaCl (Chempur, Piekary Śląskie, Poland). Then, 40 µl of each dilution was spread onto the bottom LB agar supplemented with ampicillin to a final concentration of 50 µg/ml (EPRO, Władysławowo, Poland). After overnight incubation at 37°C, the bacterial colonies were counted, and the CFU/ml was determined.

### Survival of host bacteria after phage infection in pro-lytic or pro-lysogenic conditions

The procedure described previously was used, with slight modifications [23]. Briefly, host cells were cultured with aeration at 37°C to an OD<sub>600</sub> of 0.2. Then, 1 ml of the sample was centrifuged (2000 × g, 10 min, 4°C) and the pellet was suspended in (i) 1 ml of LB medium enriched with 10 mM MgSO<sub>4</sub> and CaCl<sub>2</sub> (pro-lytic conditions) or (ii) 1 ml of TCM buffer (pro-lysogenic conditions; 10 mM Tris-HCl, 10 mM MgSO<sub>4</sub>, 10 mM CaCl<sub>2</sub>; pH 7.2). Tested bacteriophages were added to the bacterial suspension to an m.o.i. of 5. In the control variant of the experiment, TM buffer (10 mM Tris-HCl, 10 mM MgSO<sub>4</sub>; pH 7.2) was used instead of phage lysate. The mixture was incubated for 15 min at 37°C, and then serial 10-fold dilutions were prepared in 0.85% NaCl (Chempur, Piekary Śląskie, Poland). Then, 40 µl of each dilution was spread onto the bottom LB agar supplemented with ampicillin to a final concentration of 50 µg/ml. Following overnight incubation at 37°C, the fraction of surviving bacteria was calculated relative to the control variant not infected with tested phages.

### Estimation of efficiency of lysogenization

Lysogens among survivors were identified according to the procedure described by [28], with one minor modification. Briefly, bacterial colonies obtained after phage infection were passaged separately, each in a well of a 96-well plate filled with 200 µl of LB medium. The suspensions were incubated with shaking at 37°C to an OD<sub>600</sub> of 0.1. For estimation of the number of lysogens among tested bacterial cells, mitomycin C was added to each well to a final concentration of 1 µg/ml (this antibiotic had been demonstrated previously to induce prophages in *E. coli* bacteria [23, 26, 29]). The plates were then incubated for an additional 3 h. Afterward, 12 µL of chloroform was added to each well and the plates were centrifuged (2000 × g, 10 min, 4°C). Then, 2.5 µl of water phase was spotted onto double-layer LB agar supplemented with 2.5 µg/ml of chloramphenicol. The plates were incubated at 37°C for 20 h. A colony was determined as lysogenic if plaques were formed on a bacterial lawn. The efficiency of lysogenization was calculated as a percent of lysogens among all tested bacterial colonies that survived phage infection.

### Intracellular lytic development of tested phages in host bacteria

One-step growth experiments were performed as described previously by [23]. Host bacteria were cultured in LB medium supplemented with 10 mM MgSO<sub>4</sub> (Chempur, Piekary Śląskie, Poland) and 10 mM CaCl<sub>2</sub> (Chempur, Piekary Śląskie, Poland) at 37°C to an OD<sub>600</sub> of 0.2. Then, 10 ml of bacterial suspension was centrifuged (3000 × g, 10 min, 4°C) and the obtained pellet was suspended in 1 ml of fresh LB medium with 3 mM NaN<sub>3</sub> (Merck, Darmstadt, Germany). The phage lysate was added to the host culture to a multiplicity of infection (m.o.i.) of 0.05. Following 10-min incubation at 37°C, the mixture was diluted 10-fold in LB medium supplemented with 3 mM NaN<sub>3</sub> and centrifuged (3000 × g, 10 min, 4°C). The supernatant containing free, unadsorbed virions was discarded and the bacterial pellet was suspended in 1 ml of LB medium with 3 mM NaN<sub>3</sub>. The procedure of centrifugation was repeated 3 times (3000 × g, 10 min, 4°C) to remove free phage particles. In the next step, 25 µl of phage-bacteria mixture was added to 25 ml of LB medium (time 0) and cultivated in an incubator shaker at 37°C. The number of infective centers was estimated from samples taken 5 min, 10 min, and 15 min after phage infection by plating under permissive conditions. Samples taken at the indicated times were cleared with chloroform and following the centrifugation step (2000 × g, 5 min, 4°C), the number of phage progeny was determined by using the double overlay plaque assay. Petri



dishes were incubated at 37°C for 20 h and then burst size was calculated as a ratio of phage titer to the number of infection centers.

### Adsorption experiments

The rate of phage adsorption process was measured according to the procedure described by [30], with some modifications. Overnight cultures of the host strain were 100-fold diluted in LB medium supplemented with 10 mM MgSO<sub>4</sub> and 10 mM CaCl<sub>2</sub> and incubated with aeration at 37°C to an OD<sub>600</sub> of 0.2. Then, the phage stock solution was added to  $6 \times 10^8$  bacterial cells to an m.o.i. of 0.1. To determine the initial phage titer, the same volume of phage lysate was mixed with 3 ml of LB with 10 mM MgSO<sub>4</sub> and 10 mM CaCl<sub>2</sub> (time 0). At given time points, 100 µl samples were collected and added to 900 µl of TM buffer (10 mM Tris-HCl, 10 mM MgSO<sub>4</sub>; pH 7.2). Following centrifugation (12000 x g, 1 min, 4°C), the obtained supernatant with unadsorbed phage particles was passed through the filter with a 0.22-µm-pore size SFCA membrane (Thermo Fisher Scientific, Waltham, Massachusetts, USA). Ten-fold dilutions of the supernatant were prepared in TM buffer (10 mM Tris-HCl, 10 mM MgSO<sub>4</sub>; pH 7.2) and full-plate titration was used to calculate the percentage of phage particles adsorbed on the host cell surface. For this purpose, a volume of 25 µl of each dilution was mixed with 1 ml of the overnight culture of the *E. coli* MG1655 strain and 2 ml of the top LB agar supplemented with 10 mM MgSO<sub>4</sub> and 10 mM CaCl<sub>2</sub>. The mixture was gently vortexed for 10 s and poured onto the LB bottom agar containing the sublethal concentration of chloramphenicol (2.5 µg/ml; EPRO, Władysławowo, Poland). The percentage of the adsorbed phages was calculated as follows: ((initial titer—residual titer)/initial titer) x 100.

### Bacterial RNA extraction

For the isolation of total RNA from host cells after infection with tested phage, the previously described procedure was employed [23]. Briefly, *E. coli* MG1655 bearing plasmid pUC18 or pUC18\_24B\_1 was grown in LB medium with shaking at 37°C to an OD<sub>600</sub> of 0.3. Then, 120 ml of the sample was centrifuged (2000 x g, 10 min, 4°C) and the obtained bacterial pellet was washed once with 30 ml of 0.85% NaCl (Chempur, Piekary Śląskie, Poland). Following centrifugation (2000 x g, 10 min, 4°C), the sample was suspended in 36 ml of the LB medium supplemented with 10 mM MgSO<sub>4</sub> and 10 mM CaCl<sub>2</sub>. Phage particles were added to the bacterial culture to an m.o.i. of 1.5 and the mixture was incubated with aeration at 37°C. Samples were taken at times 0, 2, 6, and 8 min and treated with Killing buffer (200 mM NaN<sub>3</sub>, 50 mM MgCl<sub>2</sub>, 200 mM Tris-HCl pH 8.0) to inhibit the growth of host bacteria. The total RNA was extracted using the High Pure RNA Isolation Kit (Roche Diagnostics International, Rotkreuz, Switzerland) according to the manufacturer's protocol. To complete the digestion of genomic DNA from RNA samples, TURBO DNA-free<sup>TM</sup> Kit (Thermo Fischer Scientific, Waltham, Massachusetts, USA) was employed. The RNA concentration and quality were assessed by a NanoDrop spectrophotometer (Eppendorf, Hamburg, Germany) and agarose gel electrophoresis. Additionally, the absence of DNA was verified by PCR amplification and quantitative real-time reverse transcription-PCR (RT-qPCR) for all tested genes.

### Reverse transcription

cDNA synthesis *via* reverse transcription was performed with 1.25 µg of RNA template, the Transcriptor Reverse Transcriptase, and random hexamer primers (Roche Diagnostics International, Rotkreuz, Switzerland), following the manual supplied by the provider.

## Real-time PCR assay and data analysis

Quantification of transcripts in all tested samples was performed using LightCycler<sup>®</sup> 480 SYBR Green I Master (Roche Diagnostics International, Rotkreuz, Switzerland) according to the procedure described previously by [23]. The qPCR reaction contained 10 µl 2x SYBR Green I Master, 6.25 ng/µl cDNA, and 200 nM specific primers (Table 2). Real-time PCR amplification was performed with the following amplification program: 95°C for 5 min, followed by 55 cycles of 95°C for 10 s, 60°C for 15 s, and 72°C for 15 s. The *icdA* was selected as a housekeeping gene that showed no changes in expression levels in the presence of tested bacteriophages [31]. No-template controls and a melting curve analysis were performed for each reaction to ensure the specificity of the product. The relative changes in gene expression were analyzed with LinRegPCR using the E-Method with efficiency correction [23, 29].

## Metabolite extraction procedure

The extraction of intracellular metabolites from bacterial cells was performed according to the procedure described by [32], with some modifications. Briefly, an overnight culture of

**Table 2. Oligonucleotides used in RT-qPCR assay.**

| Primer name   | Sequence (5'→3')         |
|---------------|--------------------------|
| pF_Φ24B_xis   | TATCGCGCCGGATGAGTAAG     |
| pR_Φ24B_xis   | CGCACAGCTTTGTATAATTGCG   |
| pF_Φ24B_cIII  | ATTCTTTGGGACTCCTGGCTG    |
| pR_Φ24B_cIII  | GTAAATTACGTGACGGATGGAAAC |
| pF_Φ24B_N     | AGGCGTTTCGTGAGTACCTT     |
| pR_Φ24B_N     | TTACACCGCCCTACTCTAAGC    |
| pF_Φ24B_cI    | TGCTGTCTCCTTTACACGA      |
| pR_Φ24B_cI    | GCGATGGGTGGCTCAAAATT     |
| pF_Φ24B_cro   | CGAAGGCTTGTGGAGTTAGC     |
| pR_Φ24B_cro   | GTCTTAGGGAGGAAGCCGTT     |
| pF_Φ24B_cII   | TGATCGCGCAGAACTGATTAC    |
| pR_Φ24B_cII   | GACAGCCAATCATCTTTGCCA    |
| pF_Φ24B_O     | AAGCGAGTTGCCACGAT        |
| pR_Φ24B_O     | GAACCCGAAGTCTTACCG       |
| pF_Φ24B_Q     | GGGAGTGAGGCTTGAGATGG     |
| pR_Φ24B_Q     | TACAGAGGTTCTCCCTCCCG     |
| pF_Φ24B_cat   | TCACCAGCTCACCCTCTTTC     |
| pR_Φ24B_cat   | TTCTTGCCCGCTGATGAAT      |
| pF_Φ24B_S     | CTGGGGAGTCTGCTGTTTGG     |
| pR_Φ24B_S     | GCCTTACGCCGGTCTTCTTT     |
| pF_Φ24B_R     | GGGTGGATGGTAAGCCTGT      |
| pR_Φ24B_R     | TAACCCGGTCGCATTTTTC      |
| pF_Φ24B_d_ant | TGTTTGCTACCGGCTGAAT      |
| pR_Φ24B_d_ant | CCCTTTGCCTGTATCAGCCA     |
| pF_Φ24B_Rz    | AACCGTGTCTGTGTGTGGT      |
| pR_Φ24B_Rz    | GGTTGTGTGCCAGCCACAG      |
| pF_Φ24B_Rz1   | CGGATCAACGCCACCTGC       |
| pR_Φ24B_Rz1   | GTTGCATTATCCACGCCGG      |
| pF_Φ24B_icdA  | CGAAGCGGCTGACCTTAATTG    |
| pR_Φ24B_icdA  | GTTACGGTTTTTCGCGTTGAT    |

<https://doi.org/10.1371/journal.pone.0296038.t002>

bacterial cells was diluted 1:1000 in the fresh LB medium and cultivated at 37°C with shaking. At appropriate time points during growth, 16 units of OD<sub>600</sub> were harvested and centrifuged (7200 x g, 15 min, 4°C). The supernatant was removed, and the obtained pellet was subsequently washed three times with pre-chilled PBS (7200 x g, 15 min, 4°C; Thermo Fisher Scientific Inc., Waltham, MA, USA). Finally, the pellet was deeply frozen in liquid nitrogen and suspended in 1 ml of ultrapure water (Thermo Fisher Scientific Inc., Waltham, MA, USA). Bacterial cells were then disrupted by ultrasonication for 1 min at 20% power in an Omni-Ruptor 4000 (OMNI International, Kennesaw, USA) and centrifuged (13000 x g, 15 min, 4°C). The obtained cell lysate was filtered through Vivaspin centrifugal concentrator 3KDa (Merck, Darmstadt, Germany) and 448 µl of filtrate was mixed with 50 µl of DSS standard solution (Merck, Darmstadt, Germany) and 2 µl of D<sub>2</sub>O (Merck, Darmstadt, Germany). Each sample prepared in this way was transferred to a separate NMR tube for analysis.

### NMR spectroscopy and quantification of metabolites

A series of 1D NMR spectra were acquired at 298 K on the 700 MHz Bruker Avance-III NMR spectrometer using the stock pulse sequence for a NOESY experiment with presaturation (*noesypr1d*). The combined acquisition delay and acquisition time was set to 5 s with a mixing time of 0.1 s. The final spectrum represented a total of 128 scans. Spectra were processed with minimal solvent suppression and 1.0 Hz exponential line broadening using NMRPipe [33]. Chenomx NMR Suite v9.02 (Chenomx) was used for all subsequent spectral analyses. The metabolites chosen for the survey were selected from the Chenomx 700 MHz database. To be included in the survey, a metabolite had to have at least one peak with an unambiguous chemical shift that could be accurately measured against a DSS standard with a precision of 0.005 ppm against the reference value. Metabolite plots were made with Pro-Fit v7.0.19 (Quantum Software).

### Preparation of RNAs

A 20-nt 24B\_1 RNA was chemically synthesized (Metabion, Planegg, Germany; S1 Table). For other RNAs, the DNA templates for the *in vitro* transcription were obtained by primer extension method (Metabion, Planegg, Germany; S2 Table) and transcribed with T7 RNA polymerase as previously described [34]. RNAs were purified by gel electrophoresis and 5'-<sup>32</sup>P labeled using T4 polynucleotide kinase (Thermo Fisher Scientific Inc., Waltham, MA, USA), which was followed by phenol-chloroform extraction, purification on P-30 spin columns (Bio-Rad Laboratories Inc., Hercules, USA), and ethanol precipitation.

### Protein overproduction and purification

The *E. coli* Hfq protein was purified as described elsewhere [35].

### Equilibrium Binding Assay

Prior to use, RNAs were denatured by heating at 90°C during 2 min, then refolded on ice for 5 min. The desired range of unlabeled RNA or Hfq concentrations were obtained by serial dilution in the binding buffer (24 mM Tris, pH 7.5, 150 mM NaCl, 5% glycerol, 100 µg/ml BSA, 1 mM MgCl<sub>2</sub>). Unlabeled RNAs or Hfq protein dilutions were then mixed in a 1:1 ratio with 2 nM <sup>32</sup>P-labeled RNAs in the binding buffer. The final concentrations were 1 nM of <sup>32</sup>P-RNA and 100 nM of unlabeled RNA or Hfq at maximum. Incubations were performed for 4 hours for RNA-RNA assays and for 0.5 hour for RNA-Hfq assays at RT in low-protein binding microplates. Afterward, 5 µl aliquots were loaded onto a 6% non-denaturing polyacrylamide



gel (19:1) and run in 0.5x TBE buffer. Gels were vacuum-dried, exposed to phosphor screens, and quantified using a phosphorimager (Fujifilm FLA-5000) with ImageQuant software. The equilibrium dissociation constant ( $K_d$ ) values were calculated by fitting data to the quadratic equation using GraphPad Prism software. Standard deviations were calculated from at least three independent experiments.

## Statistical analysis

The data are expressed as the means  $\pm$  SD. All experiments were repeated at least three times. Comparisons of two average values were compared by using Student's *t*-test. Significant differences were marked by asterisks as follows:  $p < 0.05$  (\*),  $p < 0.01$  (\*\*), or  $p < 0.001$  (\*\*\*).

## Results

### Effects of the 24B\_1 RNA overproduction on the bacteriophage development in *E. coli* bacteria

To test if the overproduction of the small, microRNA-size, 24B\_1 molecule can influence the development of bacteriophage  $\Phi 24_B$ , we constructed an *E. coli* bacterial mutant bearing an additional copy of the gene coding for the 24B\_1 molecule in the plasmid pUC18. After infection with wild-type phage  $\Phi 24_B$ , the production of the 24B\_1 molecule occurred due to the activity of genes located in both the phage genome and plasmid pUC18\_24B\_1. Importantly, because of our observation that IPTG, the synthetic inducer of the *lac*-operon in pUC18, used at concentrations even lower than standard 1 mM, negatively affected the growth of *E. coli* bacteria used as hosts (S1 Fig), we decided to express the 24B\_1 gene from its natural promoter  $p_{24B\_1}$ .

To assess whether the specific aspects of phage development are targeted by the 24B\_1 molecule under its overexpression conditions, we conducted a series of physiological experiments that provided results opposite to those obtained in the case of the phage deletion mutant  $\Phi 24_B\Delta 24B\_1$ . This mutant was unable to produce the studied sRNA molecule as published by us previously [23]. The measurement of the efficiency of phage progeny production during the lytic cycle occurring after infection of non-lysogenic *E. coli* with the phage indicated that this process was less efficient in the bacterial strain bearing an additional copy of the 24B\_1 gene on a plasmid relative to the control strain carrying the pUC18 vector (Fig 1).

Curiously, the adsorption efficiency of the  $\Phi 24_B$  phage particles on the host cells MG1655 [pUC18\_24B\_1] bearing additional copies of the 24B\_1 gene was higher relative to the control strain MG1655[pUC18] (Fig 2). This difference was significant at the initial minutes of the experiment before the phage entered subsequent phases of development in the bacterial cell.

When comparing the lysis profile of bacterial cultures MG1655[pUC18] and MG1655 [pUC18\_24B\_1] infected with  $\Phi 24_B$  or  $\Phi 24_B\Delta 24B\_1$  at an m.o.i. = 1.5, we observed that the lysis efficiency was the lowest in the case of the bacterial variant with 24B\_1 overproduction. In comparison with the culture lacking the 24B\_1 gene (cells bearing pUC18 and infected with the phage deletion mutant  $\Phi 24_B\Delta 24B\_1$ ) the variant with 24B\_1 overproduction showed significantly higher optical density OD<sub>600</sub> values (Fig 3A) and the numbers of survived cells (CFU/ml) (Fig 3B). Interestingly, a similar tendency between these two bacterial variants was revealed in the number of lysogens at 180 min after phage infection. Among cells that survived the infection, we noted 28% and 56% of lysogens of MG1655[pUC18]( $\Phi 24_B\Delta 24B\_1$ ) and MG1655[pUC18\_24B\_1]( $\Phi 24_B$ ), respectively (Fig 3C).

The significant differences in the number of survived host bacteria MG1655[pUC18] and MG1655[pUC18\_24B\_1] as well as the number of lysogens appearing after the infection with

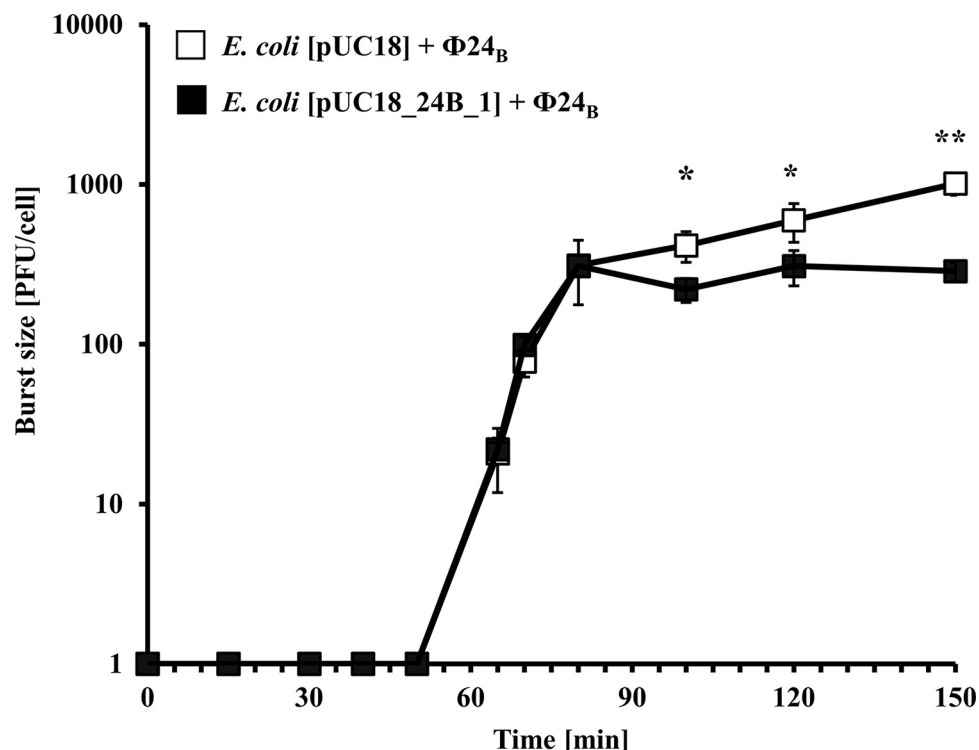

**Fig 1. Kinetics of phage progeny production during the intracellular life cycle of Stx phage Φ24<sub>B</sub> in the *E. coli* MG1655 host bearing pUC18 (□) or pUC18\_24B\_1 (■) plasmids.** The presented results are mean values from three biological experiments with error bars indicating SD. Note that in some cases, the error bars are smaller than the sizes of symbols. Statistical analysis was performed by using a Student's *t*-test. The significance of differences between compared experimental variants is marked by asterisks: *p* < 0.05 (\*) or *p* < 0.01 (\*\*).

<https://doi.org/10.1371/journal.pone.0296038.g001>

phage Φ24<sub>B</sub>Δ24B\_1 and Φ24<sub>B</sub>, respectively, were also observed at an m.o.i. = 5. These experiments were conducted under pro-lysogenic (poor in nutrients) and pro-lytic (rich in nutrients) conditions. The results obtained under pro-lysogenic conditions (Fig 4A and 4B) indicated that the number of survived bacterial cells (CFU/ml), and the number of lysogens among survivors were significantly higher in strains experiencing 24B\_1 overproduction. The controls included MG1655 bacteria bearing vector pUC18 either (i) infected with wild-type phage Φ24<sub>B</sub>, thus presenting the natural, unchanged level of 24B\_1 expression, or (ii) infected with the phage deletion mutant Φ24<sub>B</sub>Δ24B\_1, thus having the 24B\_1 production turned off completely. These results together demonstrate that lysogenization is favored by additional copies of the 24B\_1 gene. Under pro-lytic conditions, the fraction of bacterial cells (CFU/ml) surviving the infection was also significantly higher when overproduction of 24B\_1 occurred. It is worth noting that in this case, prophages were formed at similar frequencies in all tested variants (Fig 4C and 4D). Importantly, in relation to the control variants of cells non-treated with phages, the number of cells that survived the infection in all tested variants (MG1655 [pUC18] + Φ24<sub>B</sub>; MG1655[pUC18\_24B\_1] + Φ24<sub>B</sub>; and MG1655[pUC18] + Φ24<sub>B</sub>Δ24B\_1) was lower under rich, pro-lytic conditions (approximately 65, 80 and 20% of the not treated with phages controls, respectively) than under poor conditions (approximately 70, 115 and 50% of the controls, respectively). These observations suggest that under pro-lytic conditions the total number of the survived cells is generally lower than under pro-lysogenic conditions, and the majority of them (average 90%) are lysogens (Fig 4D).

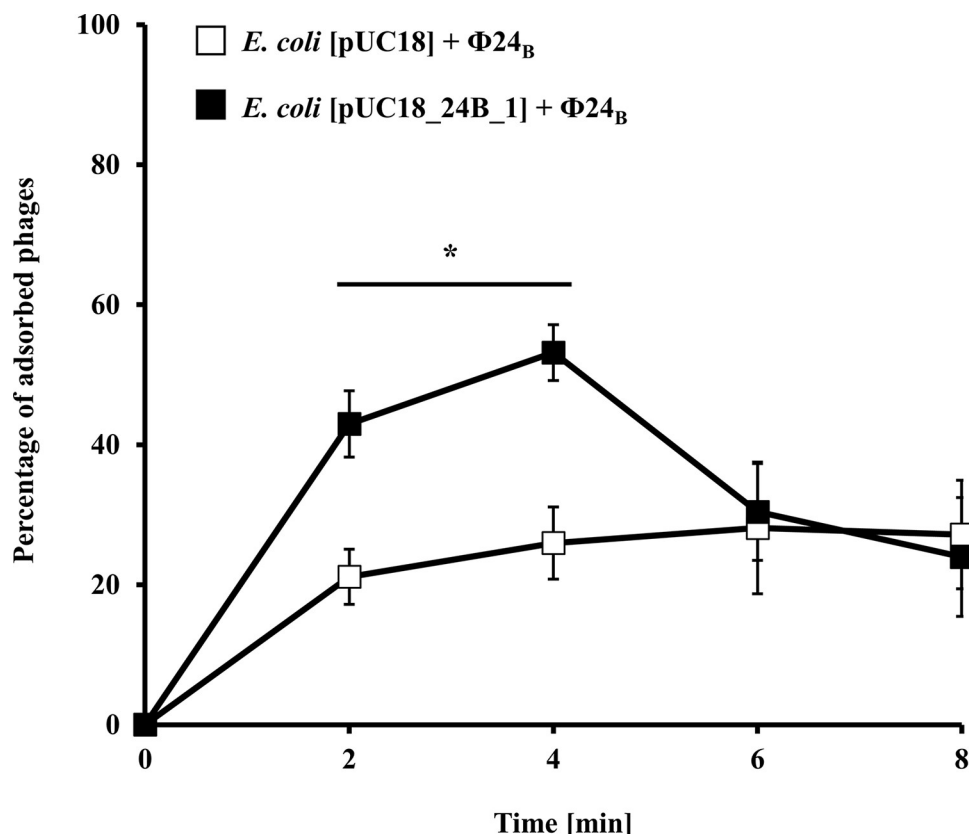

**Fig 2. Kinetics of adsorption of Φ24<sub>B</sub> phage on the surface of *E. coli* MG1655 bacterial cells bearing pUC18 (□) or pUC18\_24B\_1 (■) plasmids.** The tested bacteriophage was added to the host suspensions to an m.o.i. of 0.1. The presented results are mean values from four biological experiments with error bars indicating SD. Statistical analysis was performed by using a Student's *t*-test. The significance of differences between compared experimental variants is marked by asterisks:  $p < 0.05$  (\*).

<https://doi.org/10.1371/journal.pone.0296038.g002>

### Bacteriophage gene expression profiles in the presence of additional copies of the 24B\_1 gene

A reverse transcription quantitative real-time PCR (RT-qPCR) assay was performed to measure levels of Φ24<sub>B</sub> transcripts when 24B\_1 was overproduced. At 2 min post-infection, some of the selected phage genes were expressed at similar levels in both hosts MG1655[pUC18] and MG1655[pUC18\_24B\_1]. Contrary to the initial time, drastic differences in levels of a few phage mRNAs were observed at later times. Within the interval of 6–8 min, expression of *cI*, *cII*, and *cIII* genes increased substantially when 24B\_1 was overproduced relative to a control culture with a natural level of Φ24<sub>B</sub> synthesis (Fig 5).

It is worth noting that all of the highly expressed genes are associated with the lysogenic pathway. *CI* is the main repressor of the phage lytic development that inhibits the expression of early phage genes from *p<sub>R</sub>* and *p<sub>L</sub>* promoters. *CII* stimulates the expression of the *cI* gene and the production of an integrase, another protein participating in the lysogenic cycle. Finally, *CIII* assists with the regulation of *CII* activity, being an inhibitor of the *CII*-degrading protease [3].

### The 24B\_1 sRNA—mediated metabolic changes in bacteria

We hypothesized that widespread changes in gene expression associated with 24B\_1 would also be manifested by changes in bacterial metabolism. We began this investigation by

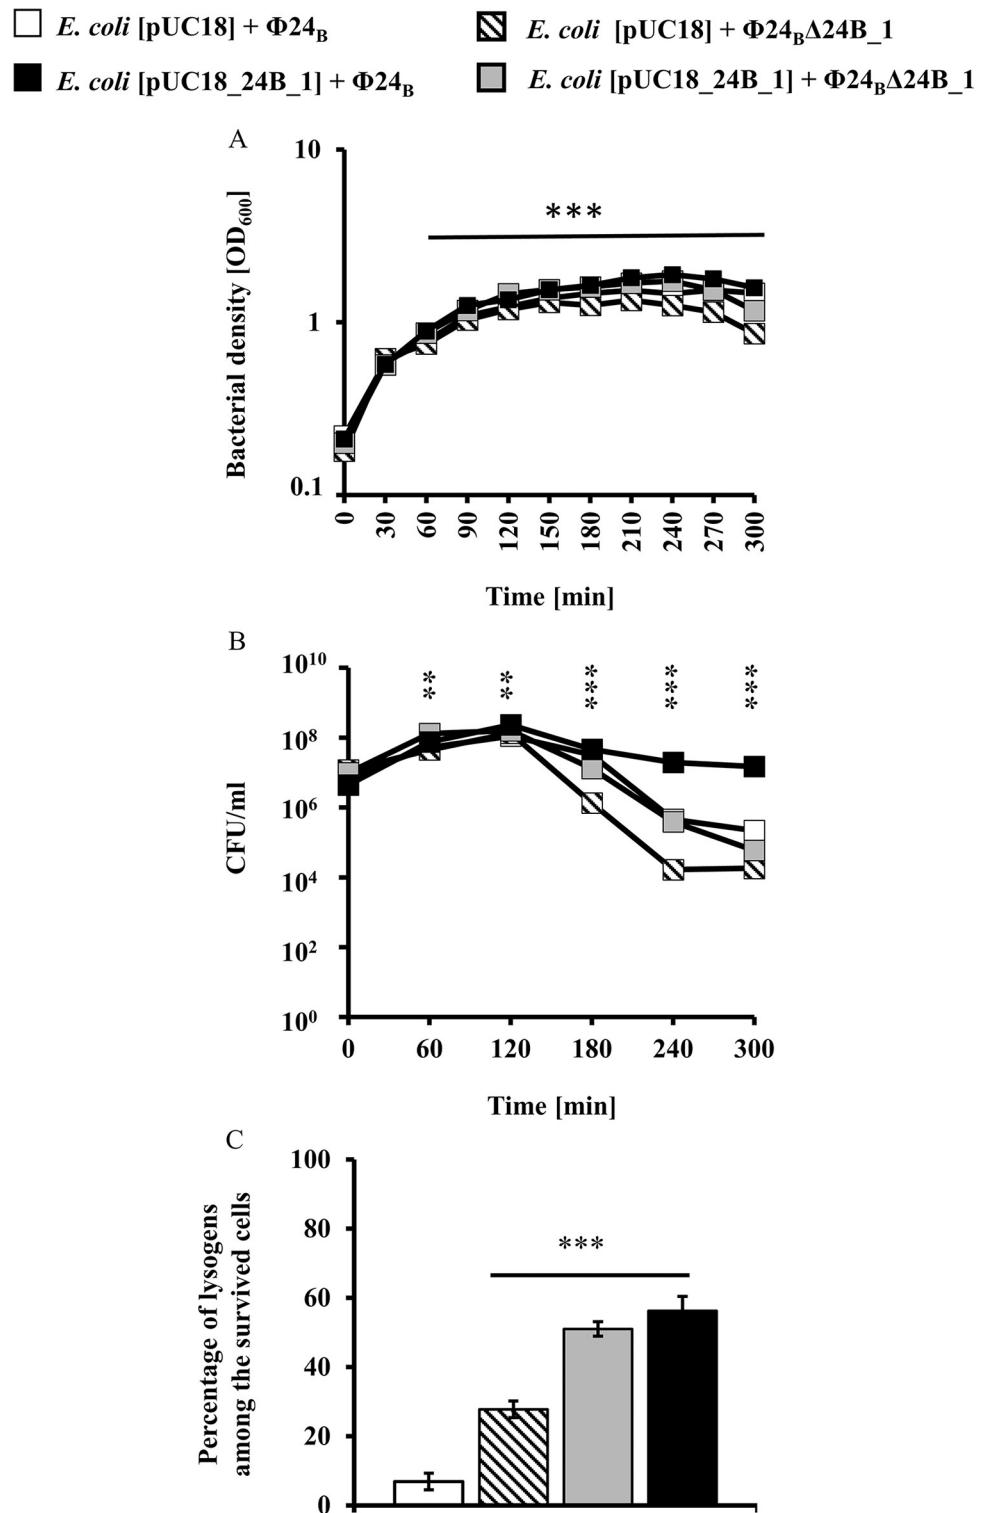

**Fig 3.** The lysis profile of host bacteria (a), their survivability presented as CFU/ml (b), and efficiency of creation of lysogens at 180 min. (c) after infection of *E. coli* MG1655 strain with Stx phages:  $\Phi 24_B$  (squares  $\square$  and  $\blacksquare$ ) and  $\Phi 24_B \Delta 24B\_1$  (triangles  $\blacktriangle$  and  $\blacktriangleleft$ ) at an m.o.i. of 1.5. Bacterial cells contained either the pUC18 (symbols  $\square$  and  $\blacksquare$ ) or pUC18\_24B\_1 (symbols  $\blacktriangle$  and  $\blacktriangleleft$ ) plasmids. The presented results are mean values from three biological experiments with error bars indicating SD. Note that in some cases, the error bars are smaller than the sizes of symbols. Statistical analysis was performed by using a Student's *t*-test. The significance of differences between *E. coli* MG1655

[pUC18\_24B\_1] and *E. coli* MG1655[pUC18] infected with  $\Phi$ 24<sub>B</sub> or  $\Phi$ 24<sub>B</sub> $\Delta$ 24B\_1, respectively, is marked by asterisks:  $p < 0.01$  (\*\*) or  $p < 0.001$  (\*\*\*).

<https://doi.org/10.1371/journal.pone.0296038.g003>

measuring the effects of 24B\_1 on ATP levels. In comparison to variants lacking the 24B\_1 sequence (MG1655[pUC18] and MG1655 strains), the 24B\_1 molecule produced from its natural promoter  $p_{24B\_1}$  (from both plasmid and phage genome) significantly decreased ATP levels in *E. coli* during the 4–6 hour interval of the experiment. Importantly, the bacterial growth rate and the number of live bacterial cells were similar in all tested variants thus excluding the possibility that the observed ATP level depends on the cell number (Fig 6).

Building upon the observation that ATP levels were different between variants producing 24B\_1 molecule and those lacking its sequence, we measured a set of thirteen metabolites according to their unique chemical shifts in a 1D NMR spectrum (Fig 7). These metabolites could be categorized into aliphatic amino acids (alanine, threonine, valine, leucine, isoleucine), aromatic amino acids (phenylalanine, tyrosine), nucleobases (inosine, uracil, cytosine, guanosine), and energy production ( $\text{NAD}^+$ , fumarate). The experiments were designed to sample metabolites at 4 hours and 6 hours of growth from a control MG1655 *E. coli* strain carrying an empty vector and an experimental strain with a plasmid supporting 24B\_1 production. Unfortunately, a determination of ATP levels could not be accurately performed using the NMR method, because the adenine base chemical shifts at  $\sim 8.0$  ppm could not be unambiguously assigned and integrated.

Comparing the 4-hour and 6-hour samples for the control plasmid in which no 24B\_1 was overproduced, the metabolite levels were more or less stably maintained, especially for the most of amino acids. Over the period sampled, the metabolic profile of cultures overproducing 24B\_1 experienced more changes. There was an excess of amino acids in the 4-hour sample that is diminished by the 6-hour sample, perhaps as the 24B\_1 RNA continues to accumulate and the culture shifts from the exponential growth phase to the stationary phase.

$\text{NAD}^+$  and fumarate have unambiguous chemical shifts in all NMR spectra making these compounds useful for diagnostics of energy usage. A representative NMR spectrum is available in the Supporting information as S2 Fig. Within the citric acid cycle,  $\text{NAD}^+$  is an electron carrier. Fumarate is the last substrate in the citric acid cycle to carry a double bond which is converted to malate upon the addition of water. Thus, if the efficiency or output of the citric acid cycle is diminished, there would be less fumarate available and an accumulation of  $\text{NAD}^+$  that is not being converted to NADH throughout the cycle. The reciprocity between fumarate and  $\text{NAD}^+$  appears to be enhanced when 24B\_1 is overproduced.

### The *sdhB* transcript as a target for the mature 24B\_1 RNA molecule

Following our key observation that 24B\_1 produced from its natural promoter  $p_{24B\_1}$  significantly decreased the ATP levels in *E. coli*, we hypothesized that the citric acid cycle may be impaired. This hypothesis was further supported by the decrease in the levels of fumarate and increased levels of  $\text{NAD}^+$  as determined by the NMR metabolomics study. Examining the idea that fumarate may be a key metabolite in addition to ATP, we compared the sequences of *sdhCDAB* genes that encode the individual subunits of succinate dehydrogenase Sdh. The sole membrane-bound Sdh enzyme participates in the citric acid cycle converting succinate to fumarate and takes part in the aerobic electron-transport pathway to generate energy via oxidative phosphorylation reactions. The bioinformatics analysis of the *sdhCDAB* genes sequences revealed the potential binding site for 24B\_1 within the *sdhB* gene coding for the FeS subunit of succinate dehydrogenase. This binding site is located at the 5' end of the *sdhB* coding sequence between nucleotides 7–26 and was predicted by IntaRNA software [36] with

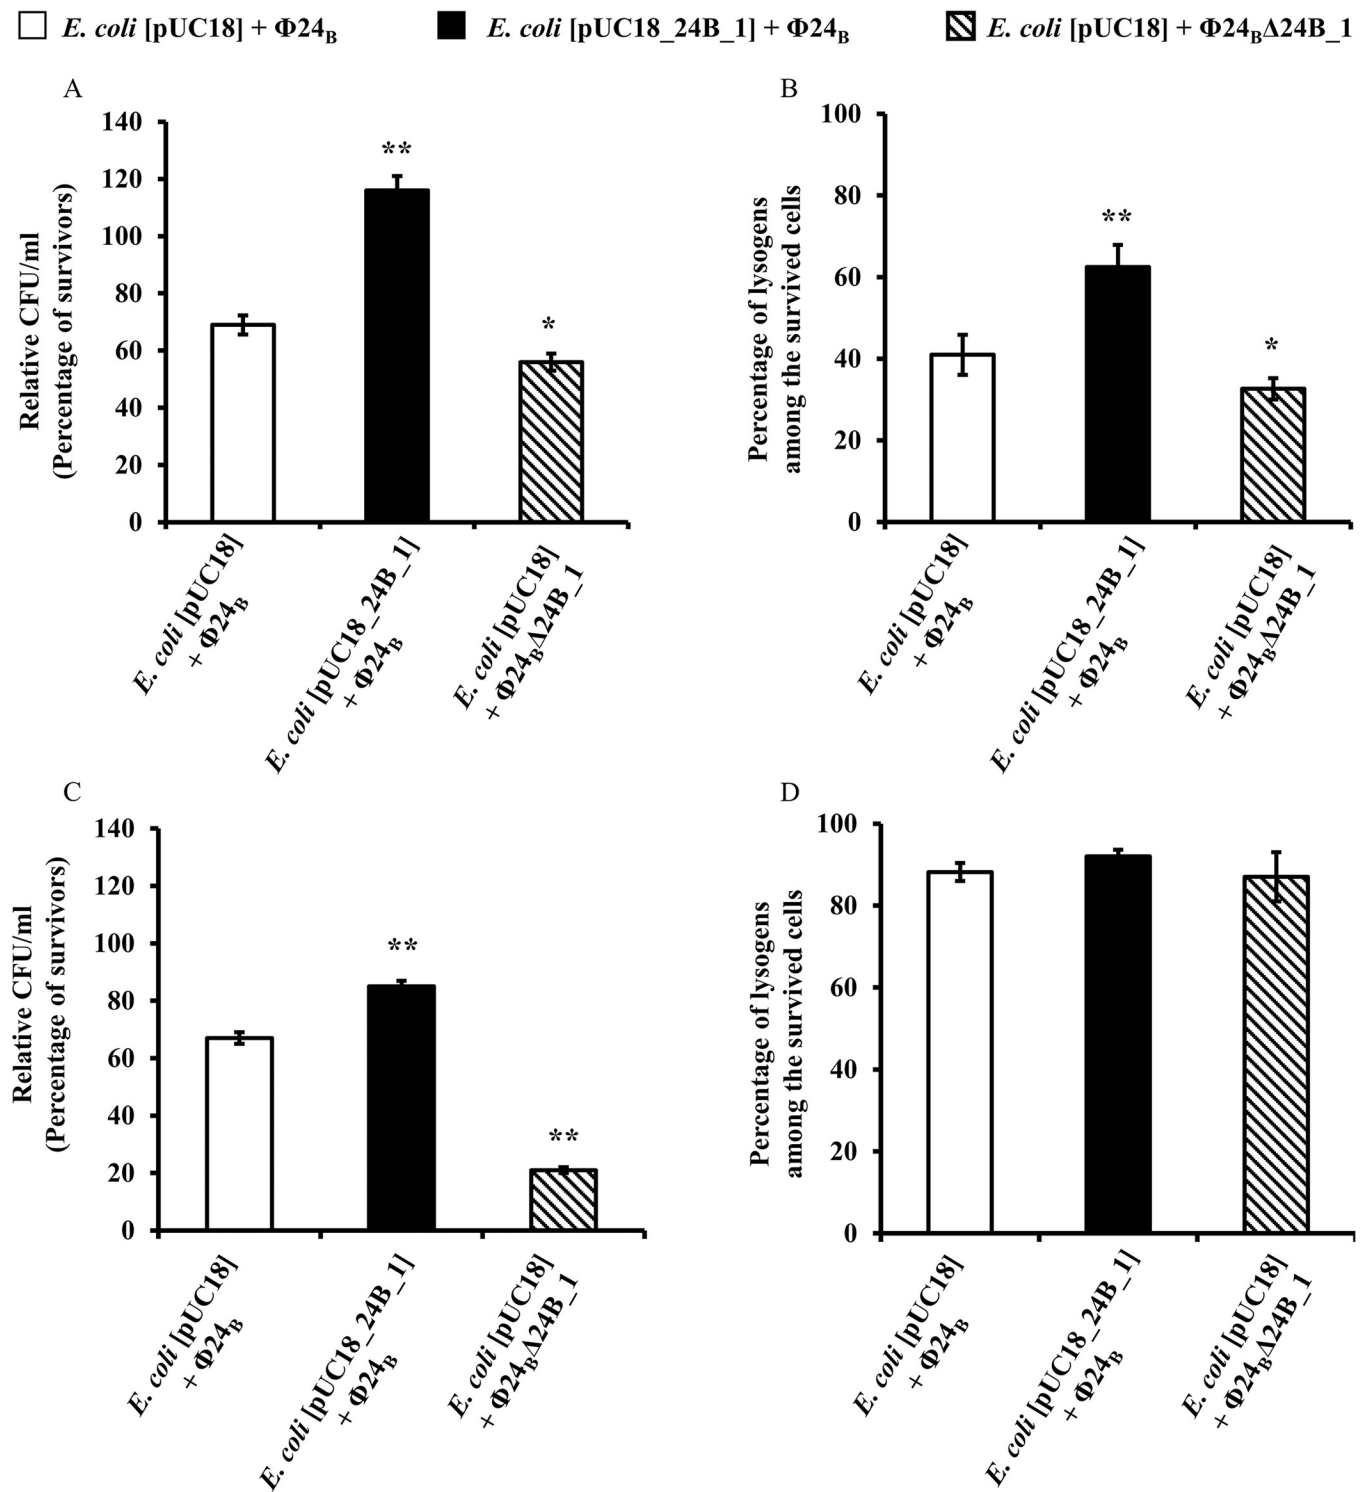

**Fig 4.** Survival of host bacteria (a, c) and efficiency of creation of lysogens (b, d) after infection of *E. coli* MG1655 strain bearing pUC18 or pUC18\_24B\_1 plasmids with Stx phages: Φ24<sub>B</sub> and Φ24<sub>B</sub>Δ24B\_1 in pro-lysogenic (a, b) or pro-lytic (c, d) conditions. Tested bacteriophages were added to the host suspension to an m.o.i. of 5. Results are presented as mean values ± SD from three independent experiments. Statistical analysis was performed by using a Student's *t*-test. The significance of differences between compared experimental variants MG1655[pUC18\_24B\_1] + Φ24<sub>B</sub> or MG1655[pUC18] + Φ24<sub>B</sub>Δ24B\_1 versus MG1655[pUC18] + Φ24<sub>B</sub> is marked by asterisks: *p* < 0.05 (\*) or *p* < 0.01 (\*\*).

<https://doi.org/10.1371/journal.pone.0296038.g004>



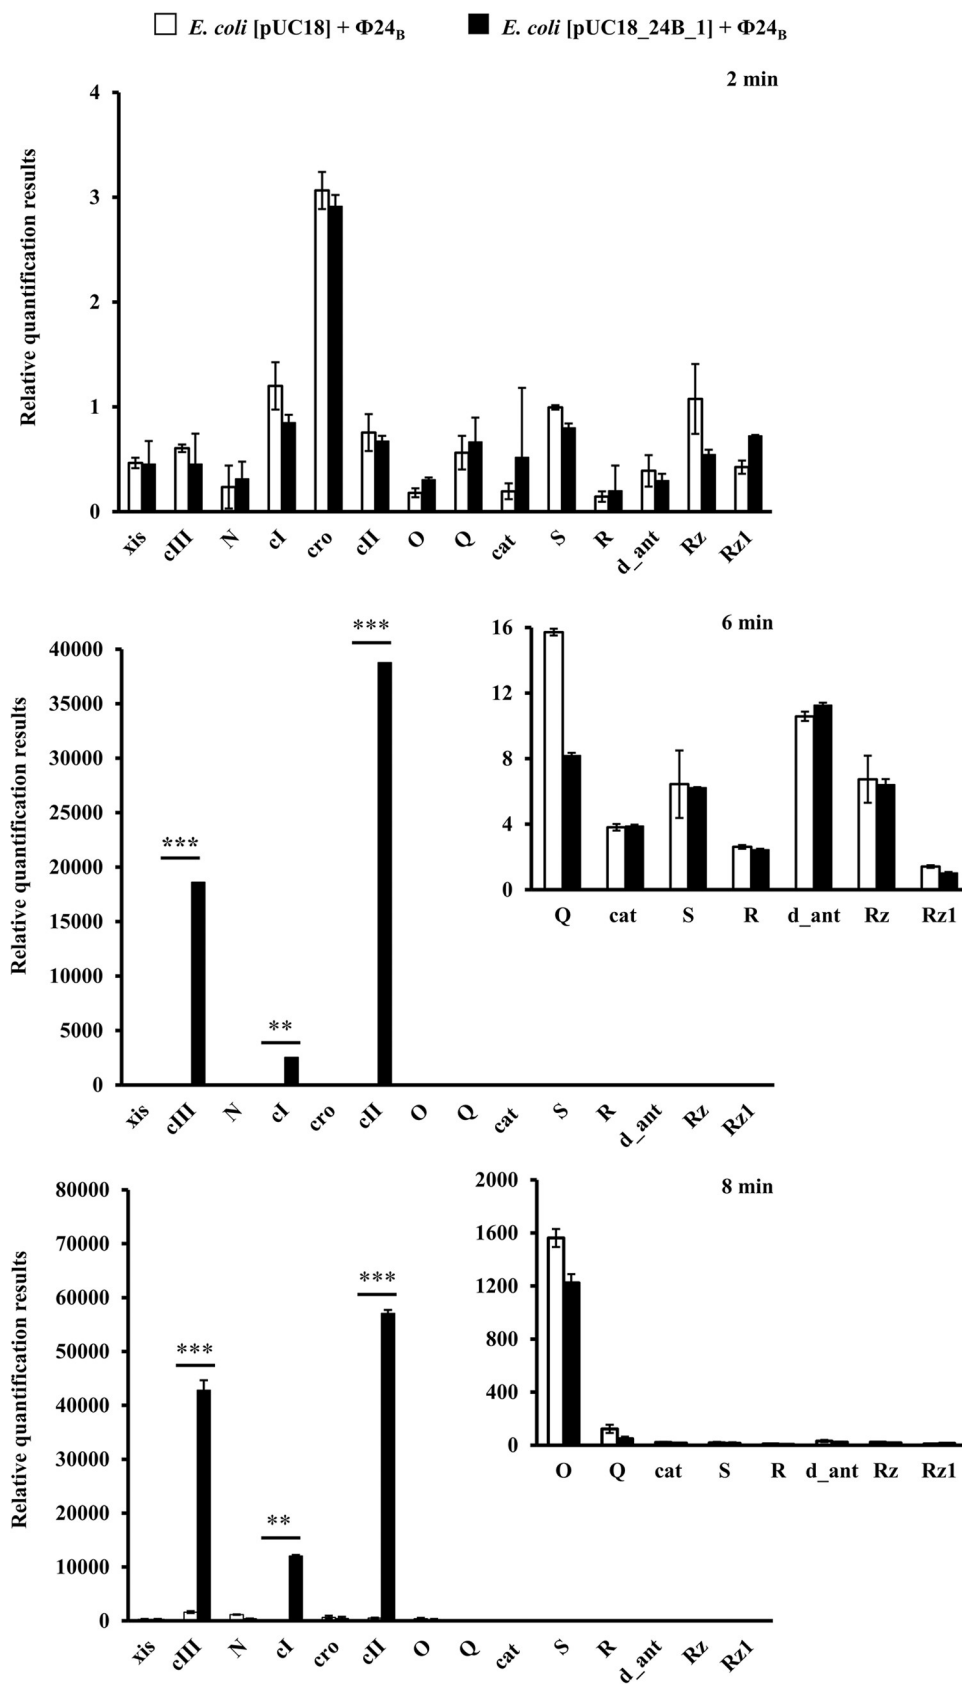

**Fig 5. The expression levels of selected bacteriophage genes assessed by RT-qPCR after infection of host bacteria bearing pUC18 (□) or pUC18\_24B\_1 (■) plasmids with phage  $\Phi$ 24<sub>B</sub> at an m.o.i. of 1.5.** The mRNA levels corresponding to particular genes were determined at the following times after infection: 2, 6, and 8 minutes. The presented results are mean values from three biological experiments with error bars indicating SD. Statistical analysis was performed by using Student's *t*-test. The significance of differences between compared experimental variants is marked by asterisks:  $p < 0.01$  (\*\*) or  $p < 0.001$  (\*\*\*).

<https://doi.org/10.1371/journal.pone.0296038.g005>

a high probability energy score (-10.56 kcal/mol) and hybridization energy value (-15.17 kcal/mol), as shown in S3 Fig. Importantly, only interaction energies below or equal to 0 are considered and such interactions are visualized by the IntaRNA program. A seed region typical for eukaryotic microRNAs was predicted by IntaRNA at positions 7–13 from the 5'-end of 24B\_1 molecule. In eukaryotic cells, the seed sequence is essential for the binding of the microRNA to the target mRNA and has to be perfectly complementary.

To test whether mature 24B\_1 or its precursor RNA can interact with the predicted pairing site at the 5' region of the coding sequence of *sdhB* gene we measured the binding of purified RNAs using an *in vitro* gelshift-based assay (Figs 8 and 9). The predicted structure of the 80-nt long precursor 24B\_1 RNA showed that the sequence corresponding to the short 24B\_1 is located in the apical portion of the long hairpin structure formed by the precursor RNA. This sequence is involved in a stable double-stranded structure, which would limit its availability for pairing to another sequence (Fig 8A). On the other hand, the 20-nt long mature 24B\_1 RNA was predicted as less structured, although it still contained a short 4-basepair double helix (Fig 8B). Additionally, in this study we used a 56-nt long mRNA fragment including the untranslated region upstream of the *sdhB* mRNA and the beginning of its coding sequence. This mRNA fragment is predicted to form a secondary structure, in which the sequence complementary to 24B\_1 is base-paired with a region including the Shine-Dalgarno sequence and the start codon of *sdhB* mRNA (Fig 8C).

When we compared the binding of the 24B\_1 precursor and the mature 24B\_1 to the 56-nt long fragment of the *sdhB* mRNA, we found that the mature 24B\_1 molecule formed a complex with the *sdhB* mRNA, although the fraction bound at the maximum 100 nM mRNA concentration used was less than 10%, which did not allow calculating the binding affinity (Fig 9B and 9c). On the other hand, the binding of the 24B\_1 precursor RNA to the *sdhB* mRNA fragment was not detected (Fig 9A). These data suggest that the mature 24B\_1 RNA is more likely to interact with other RNA molecules than the precursor RNA because its structure is less stable and, hence, it is more available for pairing with other RNAs. In particular, these data show that the mature 24B\_1 RNA can base-pair with the complementary sequence of the *sdhB* mRNA. The fact that the binding is not strong in the *in vitro* assay may indicate that the conformations of the interacting RNAs are more favorable for binding in the conditions *in vivo* or that other factors affect the RNA structure *in vivo*, thus influencing the binding.

### Hfq binds the 24B\_1 precursor form

To further characterize the properties of the mature 24B\_1 RNA and its precursor, we compared their binding to *E. coli* Hfq protein, which is known to bind many small bacterial RNAs [38, 39]. Interestingly, the data showed that Hfq did bind to the precursor RNA with a  $K_d$  value of 25 nM. On the other hand, its binding to the mature 24B\_1 RNA was not detected (Fig 10). The apical portion of the 24B\_1 precursor RNA hairpin is stably base-paired, and, hence, would not be expected to bind this protein. However, the lower part of the structure, below the base-pair G<sub>21</sub>-C<sub>53</sub>, is likely less stable and contains an U-rich internal loop, which could potentially serve as a binding site for Hfq (Fig 8A). Overall, these data suggest that Hfq could affect the stability or processing of the precursor 24B\_1 RNA, but not the mature 24B\_1

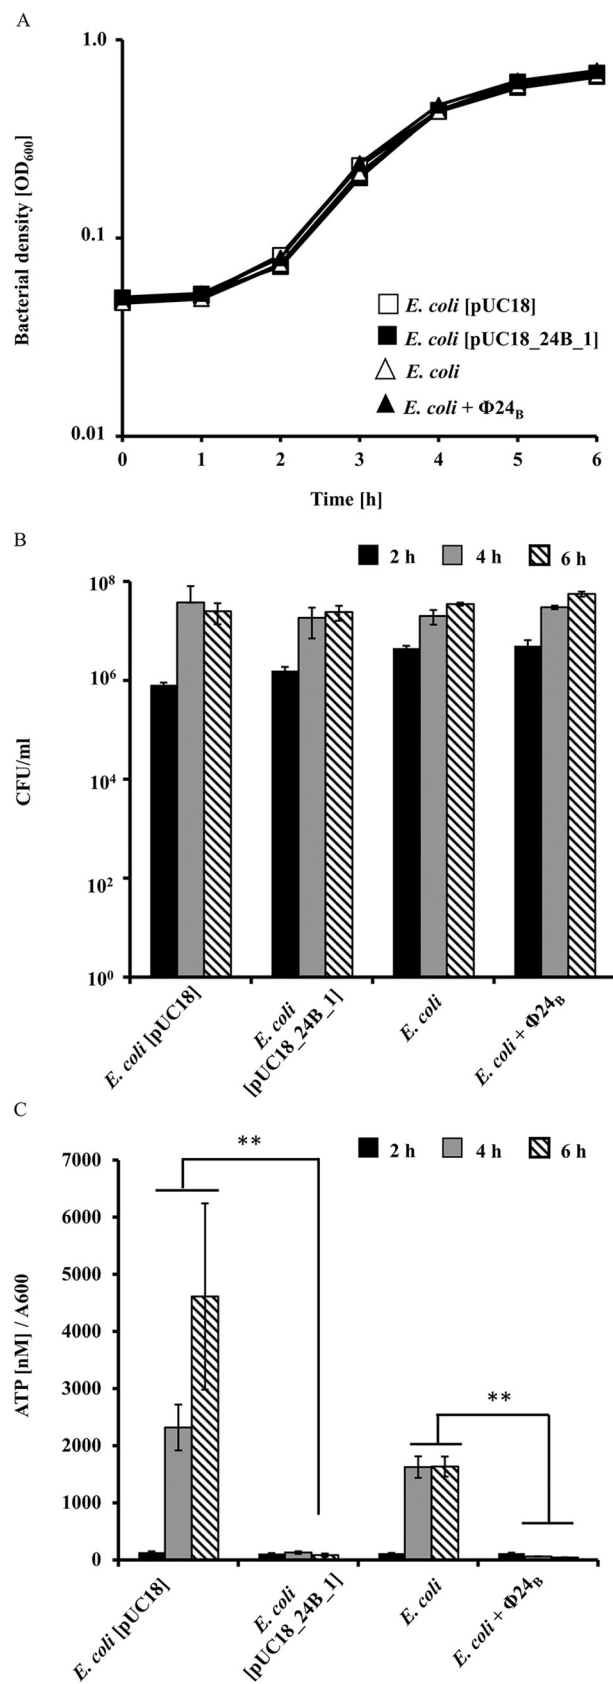

**Fig 6.** The bacterial growth kinetics (a), number of live bacterial cells presented as CFU/ml (b), and the ATP level (c) measured in *E. coli* control strains devoid of the 24B\_1 molecule gene (MG1655 and MG1655[pUC18]), and in bacterial strains able to produce 24B\_1 molecule from plasmid (MG1655[pUC18\_24B\_1]) or phage genome (MG1655 (Φ24<sub>B</sub>)). Statistical analysis was performed by using a Student's *t*-test. The significance of differences between *E. coli* MG1655[pUC18] and *E. coli* MG1655 or *E. coli* MG1655[pUC18\_24B\_1] and *E. coli* MG1655 infected with Φ24<sub>B</sub> are marked by asterisks:  $p < 0.01$  (\*\*).

<https://doi.org/10.1371/journal.pone.0296038.g006>

RNA. Hence, it is possible that mature 24B\_1 RNA does not depend on RNA-binding proteins for its function, similar to *cis*-encoded antisense RNAs, which are not dependent on Hfq for pairing with their RNA targets [40].

## Discussion

When considering the significance of small regulatory RNA molecules derived from phages, it becomes evident that they play a crucial role in the development of both the phage and its host [41]. In bacteria, these sRNAs have a profound impact on various processes such as virulence, colonization ability, motility, and cell growth or death [40]. Similarly, in the case of phages, they play vital roles during the early stages of infection, maintaining the state of lysogeny and suppressing the expression of late structural genes [42, 43].

The small RNA molecule, 24B\_1, investigated in this work and originating from the Stx phage, deserves special attention in this context. While other microRNA-size, phage-encoded regulatory RNAs have not been described yet, similar molecules are well-documented in viruses that infect eukaryotic cells, particularly herpesviruses [44, 45]. Notably, this sRNA

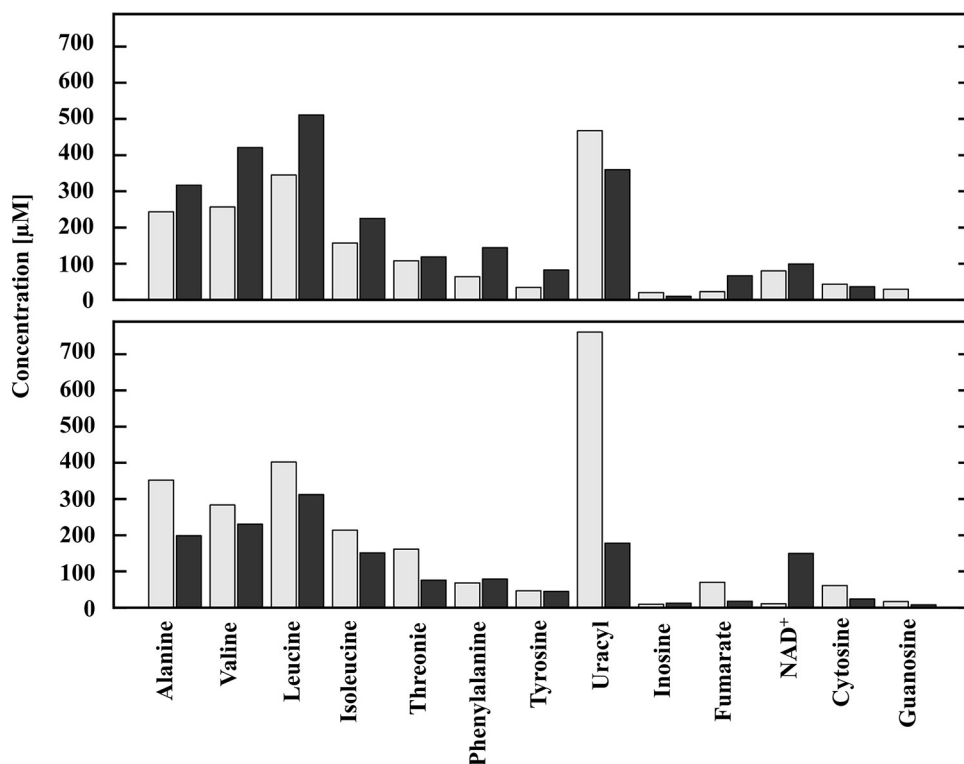

**Fig 7.** The metabolite profile of *E. coli* bacteria carrying pUC18 (light bars) and pUC18\_24B\_1 (dark bars) at four hours (upper panel) and six hours (lower panel) of the experiment. The results are the average of three repetitions and standard deviations do not exceed 10%.

<https://doi.org/10.1371/journal.pone.0296038.g007>

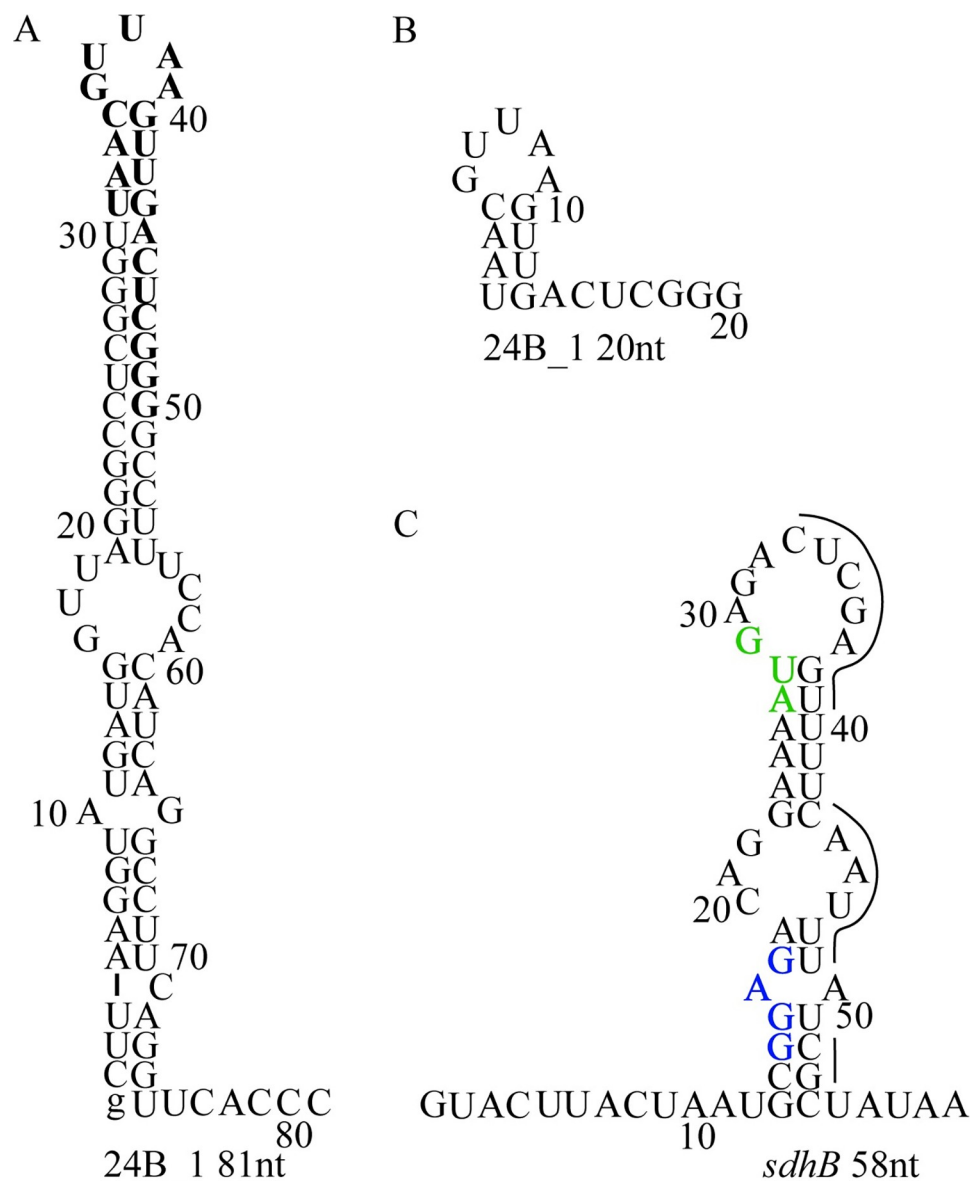

**Fig 8.** The secondary structures of the 81-nt long precursor of 24B\_1 RNA (a), the mature 20-nt long 24B\_1 RNA (b), and the sequence of the intergenic region and beginning of the coding sequence of *sdhB* gene (c), which were used in this study. The lower case g denotes guanosine residue added on the 5' end of 81-nt long 24B\_1 RNA precursor to enable T7 RNA polymerase transcription. The sequence of the 20-nt long 24B\_1 RNA within its precursor is marked in bold font (a). The Shine-Dalgarno sequence within the 5'-UTR of *sdhB* mRNA is marked in navy blue, the AUG start codon in green, and the sequence of *sdhB* mRNA predicted by IntaRNA as complementary to the mature 24B\_1 RNA is marked with a line (c). The secondary structures were predicted using RNAstructure software [37].

<https://doi.org/10.1371/journal.pone.0296038.g008>

shares several similarities with herpesviral microRNAs. Importantly, like Stx phages, herpesviruses undergo two distinct stages in their lifecycle and are able to cause latent or lytic infections and switch between these states. Similar to phage lysogeny, viral latency represents a specialized form of persistent infection where most viral genes remain silenced. Herpesviruses can reactivate and transit to the lytic stage, leading to host cell lysis and the production of infectious viral progeny, which spreads to new cells [46].

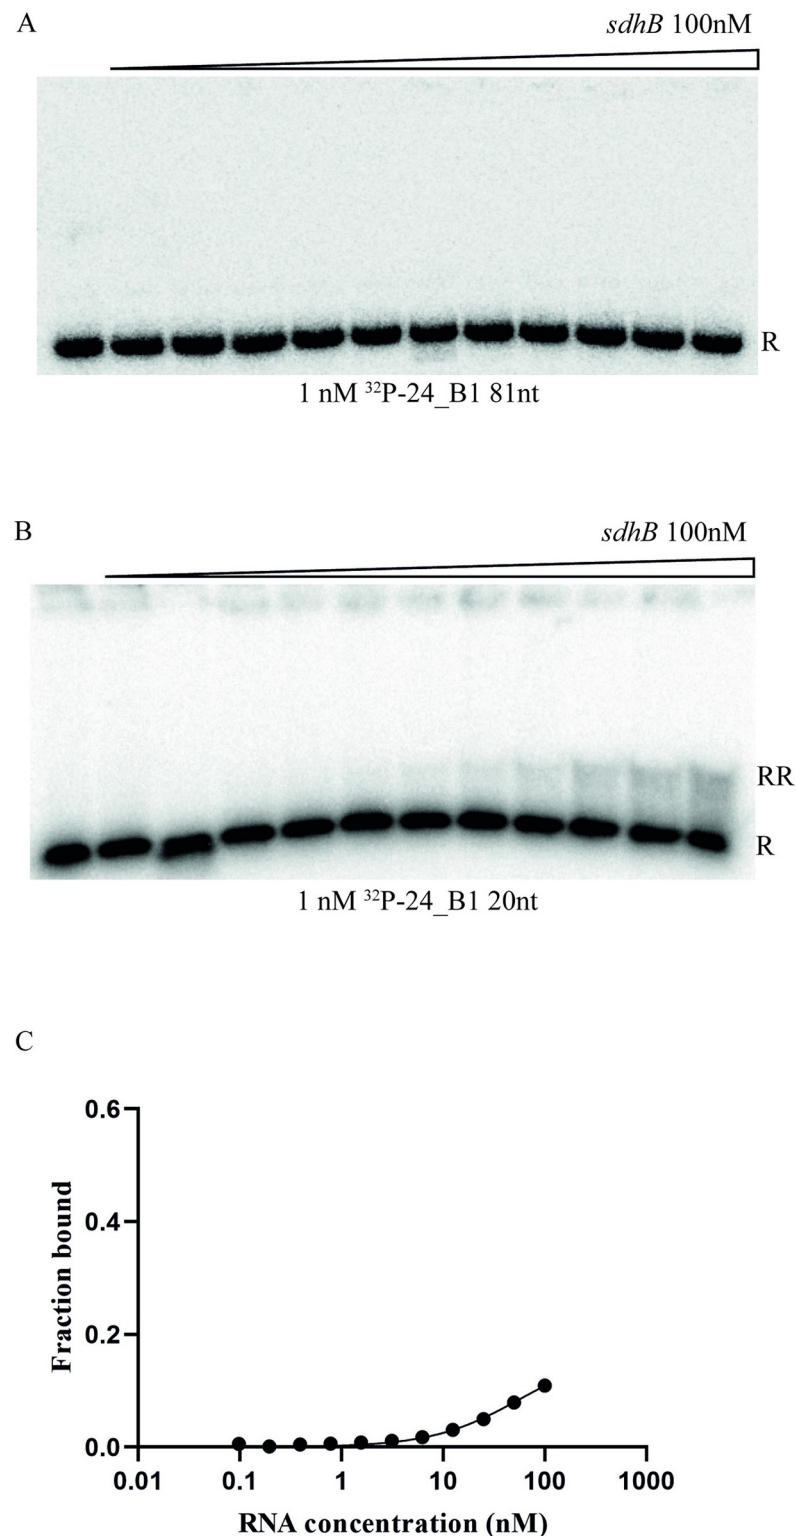

**Fig 9.** The mature 20-nt long 24B\_1 RNA base-pairs with the 5'-UTR of *sdhB* mRNA. The pairing of the  $^{32}\text{P}$ -labeled 81-nt long precursor of 24B\_1 RNA (a) and mature 20-nt long 24B\_1 RNA (b) to the 5'-UTR of *sdhB* mRNA was monitored using a gelshift assay. The fraction bound data from (b) were plotted versus RNA concentration in (c). Free  $^{32}\text{P}$ -RNA is marked as R, and RNA-RNA complex as RR. The average fraction of mature 24B\_1 RNA bound at the maximum 100 nM concentration of *sdhB* mRNA, calculated from three independent experiments, was  $8 \pm 5\%$ .

<https://doi.org/10.1371/journal.pone.0296038.g009>



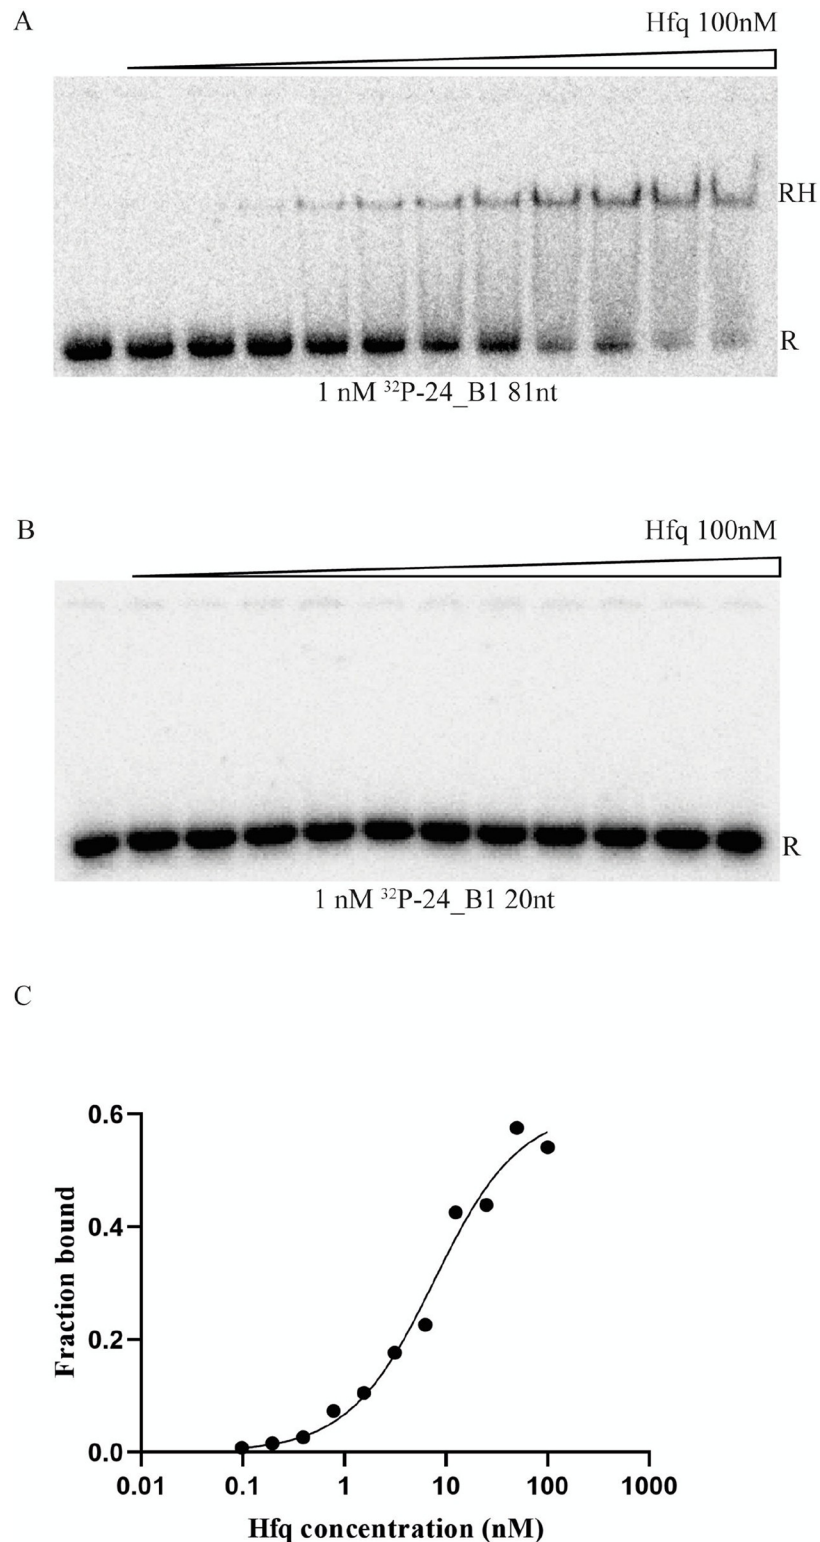

**Fig 10. The Hfq protein binds to the 81-nt long precursor of 24B\_1 RNA, but not to the mature 20-nt long 24B\_1 RNA.** The equilibrium binding of  $^{32}\text{P}$ -labeled 81 nt-long precursor of 24B\_1 (a), and the mature 20-nt long 24B\_1 RNA (b) to the Hfq protein was monitored using a gelshift assay. Free  $^{32}\text{P}$ -labeled RNAs are marked as R, and the RNA-Hfq complex as RH. The raw binding data from (a) were fit using the quadratic equation in (c). The average  $K_d$  value of  $25 \pm 13$  nM was calculated from three independent experiments.

<https://doi.org/10.1371/journal.pone.0296038.g010>

Comparable to the identified herpesviral microRNAs, 24B\_1 is a very short RNA molecule, only 20 nucleotides in length, produced through the cleavage of a precursor (80-nt long) transcript and likely undergoing a multi-step maturation process. Importantly, only the precursor form of 24B\_1 binds the bacterial RNA-binding protein called Hfq (Fig 10). The functional roles of Hfq in sRNA action are fairly well understood and widely described in the literature [38, 39, 47, 48] however, we show for the first time that this protein is able to bind the precursor form of phage 24B\_1 molecule. On the other hand, the performed analysis did not confirm the binding of the short (20-nt long) 24B\_1 with Hfq protein. This result suggests that similar to microRNAs produced in eukaryotic cells, different proteins may participate at the particular stages of maturation and operation of such small RNA molecules in prokaryotic cells. Furthermore, like most identified herpesviral microRNAs, 24B\_1 demonstrates limited complementarity with its identified target—the *sdhB* gene and actively promotes the phage's lysogenic state, which was confirmed under 24B\_1 deletion and overproduction conditions (this work). Importantly, the imperfect pairing of the *SdhB* transcript to the 24B\_1 seed region can be compensated by extended pairing interactions with the 3' end of the 24B\_1 molecule, and this phenomenon is also quite frequently observed in the case microRNAs functioning in eukaryotic cells [49].

In herpesviruses, small regulatory RNAs classified as microRNAs have been identified as key players in the maintenance of viral latency [50]. The examples are miRNAs of the murine gammaherpesvirus-68 (MHV-68) which contribute to the maintenance of latent infection *in vivo*. The investigation of mutated viruses has unveiled that the presence of MHV-68 miRNAs are not necessary for the short-term replication of the virus, but they play a crucial role in establishing a persistent infection within memory B cells, ensuring a lifelong presence [51]. In turn, miRNAs of Kaposi's sarcoma-associated herpesvirus (KSHV), such as miR-K12-11 and miR-K12-3, prevent lytic reactivation by reducing the expression of cellular transcription factors MYB, C/EBP $\alpha$ , and Ets-1 [52, 53]. The prevailing model suggests that during latency, viral microRNAs are expressed at relatively high levels, facilitating this phase of infection and thus negatively impacting the expression of lytic genes. Otherwise, during the lytic cycle, the transcripts liberate from inhibition by these microRNAs and changes occur in their transcriptional activity. As a result, although most virus-encoded microRNAs are present and detectable during the lytic phase, their role becomes diminished during this stage of infection [54]. Interestingly, as described by us previously [23], the 24B\_1 sRNA has been identified during phage lytic development, 80 minutes after prophage induction with mitomycin C. What is more, similar to viral microRNAs, the 24B\_1 sRNA plays a significant role in maintaining the phage in the form of prophage. This is supported by previous results obtained for 24B\_1 phage deletion mutant [23], and also under conditions of 24B\_1 overexpression (this study). Here, we demonstrate that an excess of the 24B\_1 molecule in the cell leads to a decrease in the efficiency of bacterial culture lysis after infection with Stx phage, and thus an increase in both the number of cells that survived the infection with phage, as well as the number of lysogens among survivors. The physiological effects were accompanied by increased levels of *cI*, *cII*, and *cIII* mRNAs which protein products are strongly associated with the lysogenic pathway. Importantly, this effect seems to be indirect as we did not find significant binding sites for the 24B\_1 molecule within these genes. In this regard, the 24B\_1 small RNA closely resembles eukaryotic microRNAs of viral origin.

In the context of persistent viral infections, the role of miRNAs encoded by herpesviruses is of utmost importance, influencing various aspects such as the metabolic processes in host cells [53]. Notably, miRNAs of Epstein-Barr virus (EBV) and KSHV disrupt the balance of metabolic processes through direct targeting of key proteins or indirect regulation of multiple signalling pathways. Recent research has shed light on the impact of several EBV miRNAs on

metabolic processes of cancer cells. For instance, the expression of miR-BART1 significantly upregulates the levels of phosphoglycerate dehydrogenase (PHGDH) in an NPC cell line called CNE1 [55]. PHGDH is a critical enzyme involved in the synthesis of serine and glycine, central metabolites that play essential roles in various biosynthetic pathways [56]. Regarding KSHV, it has been observed that viral miRNAs affect host cell energy metabolism through the regulation of multiple pathways. Firstly, KSHV miRNAs stabilize and activate the transcription factor HIF1 $\alpha$ -a master regulator of cell metabolism, by targeting EGLN2, a hypoxia-inducible factor prolyl hydroxylase. Secondly, KSHV miRNAs downregulate the mitochondrial heat shock protein A9 (HSPA9), which leads to a decrease in mitochondrial copy numbers and promotes anaerobic glycolysis (commonly known as the Warburg effect). The downregulation of EGLN2 and HSPA9 enables cancer cell proliferation even under low oxygen conditions [57]. In the field of oncology, the Warburg effect refers to the phenomenon observed in many cancer cells, where energy production primarily relies on anaerobic glycolysis rather than the typical citric acid cycle and oxidative phosphorylation occurring in the mitochondria of normal cells. This process involves high glucose uptake, followed by glycolysis and lactic acid fermentation in the cytosol, even in the presence of ample oxygen. While fermentation produces ATP with lower efficiency compared to the citric acid cycle and oxidative phosphorylation, it allows proliferating cells to utilize nutrients like glucose and glutamine more effectively for biomass production. Besides, it allows for bypassing the catabolic oxidation of nutrients into CO<sub>2</sub> and thus promotes anabolic processes [58, 59]. Surprisingly, the overproduced 24B\_1 molecule seems to induce a similar effect in prokaryotic cells. As we have shown in this work, its overproduction caused a decrease in the level of ATP and fumarate, but stimulated an increase of NAD<sup>+</sup>, which is most likely not converted to NADH. This is most likely due to the negative regulation of the succinate dehydrogenase subunit gene (*sdhB*) by 24B\_1 as *in vitro* binding of these two RNA transcripts has been observed. Sdh is the enzyme that participates in the citric acid cycle converting succinate to fumarate and takes part in the aerobic electron-transport pathway to generate energy *via* oxidative phosphorylation, thus is essential for the aerobic utilization of carbon sources. As reported recently, the Arg244His mutation in the amino acid sequence of the SDHB subunit attenuated ATP production and reduced mitochondrial number in *Caenorhabditis elegans*. These Arg244His SDHB mutants demonstrated elevated lactate/pyruvate levels, pointing to a missense-induced, Warburg-like aberrant glycolysis. Authors concluded that mutation in the amino acid sequence of SDHB rewires metabolism, resembling metabolic reprogramming in cancer [60]. Similar observations have been reported by other scientists who showed strong evidence that some mutations in SDH impair oxidative phosphorylation, which highly contributes to the Warburg metabolism switch observed in cancer cells [61–63]. The advantage of the Warburg phenomenon in cancer cells has been unclear however it was proposed that the metabolism of cancer cells, and indeed all proliferating cells, is adapted to facilitate the uptake and incorporation of nutrients into the biomass (e.g., nucleotides, amino acids, and lipids) needed to produce a new progeny of cells. Thanks to this, cancer cells metabolize nutrients in a manner conducive to proliferation rather than efficient ATP production [58]. Does the presence of the prophage in a bacterial cell cause a similar effect? Recent results obtained by Holt and collaborators [64] showed that integration of phage  $\Phi$ 24<sub>B</sub> into bacterial genome increases cell proliferation. When grown under normal conditions, both the single and double *E. coli* lysogens exhibited a considerable increase in cell numbers (exceeding 200%) compared to the MC1061 strain without  $\Phi$ 24<sub>B</sub> prophage [64]. Phage-mediated metabolic reprogramming of the bacterial cell was also presented by [65]. The authors showed that infection of the marine bacterium *Pseudoalteromonas* with PSA-HP1 phage alters central carbon and energy metabolisms. Their findings indicate that the glyoxylate shunt was

used in phage-infected cells instead of the classical citric acid cycle. Importantly, all *sdh* genes (*sdhABCD*) were downregulated 40 and 60 minutes after phage infection [65].

Undoubtedly energetic status is a significant modulator of lysogeny. The presence of a low ATP concentration within the intracellular environment creates a favorable condition for the accumulation of phage repressors of the lytic cycle. This condition not only promotes phage integration during new infections but also contributes to the persistence of existing prophages [66]. Host proteases, which rely on ATP for their proteolytic activity, serve as sensors of the cell's energy status and are regulated by cyclic AMP [67–69]. When intracellular ATP levels are high due to an abundant energy supply, the host proteases cleave the phage repressors expressed early in the infection, thus favoring the lytic cycle [68]. Thereby, the lysogeny dependence on the host's energetic metabolism and ATP amount is obvious. In this light, the observed pro-lysogenic role of the microRNA-size 24B\_1 molecule takes on a new meaning. It seems that similar to herpesviral microRNAs, 24B\_1 reprogrammes the host energy metabolism by altering the central carbon pathway and thus decreasing the cellular ATP level. The target site for the 24B\_1 molecule appears to be the succinate dehydrogenase subunit gene *sdhB*, whose dysfunction may lead to disruption of the classical citric acid cycle and trigger the activation of an alternative pathway, characterized by the production of a smaller amount of ATP. In effect, the phage CI repressor is not cleaved by proteases and inhibits the phage lytic development in the bacterial cell thus maintaining the lysogeny state. This mechanism of action of the 24B\_1 molecule on phage and host development seems to be highly probable in a light of the results presented in this work.

## Conclusions

In many aspects (such as size, presence of the precursor form, and occurrence of a multi-step maturation process) the phage non-coding RNA molecule, named 24B\_1, resembles herpesviral microRNAs. The 24B\_1 molecule plays a significant role in maintaining the prophage state and reprogramming the host's energy metabolism. This is the first report demonstrating molecular mechanisms of functions of a microRNA-size RNA molecule of the phage origin.

## Supporting information

**S1 Fig. The growth kinetics of *E. coli* bacteria in the presence of 0.4 mM (●) and 0.8 mM (▲) concentrations of IPTG.** Control *E. coli* bacteria (□) were cultured without the addition of IPTG.

(TIF)

**S2 Fig. A representative NMR spectrum for metabolic changes in *E. coli* bacteria induced by the overproduced 24B\_1 sRNA.**

(TIF)

**S3 Fig. The visualization of the potential interaction occurring between SdhB transcript and 24B\_1 molecule performed by the IntaRNA program.** The 24B\_1 molecule is located at the bottom, whereas the target mRNA is at the top of the illustrated interaction. The energy score was calculated by the software.

(TIF)

**S1 Table. Chemically synthesized RNA oligonucleotides.**

(DOCX)

**S2 Table. DNA oligonucleotides used to prepare templates for the *in vitro* transcription of the 81-nt long precursor of 24B\_1 RNA and the 58-long fragment of 5'-UTR of *sdhB***

mRNA.  
(DOCX)

S1 Raw images.  
(PDF)

## Author Contributions

**Conceptualization:** Sylwia Bloch, Natalia Lewandowska, Joanna Zwolenkiewicz, Mikołaj Olejniczak, Logan W. Donaldson, Grzegorz Węgrzyn, Bożena Nejman-Faleńczyk.

**Data curation:** Sylwia Bloch, Natalia Lewandowska, Joanna Zwolenkiewicz.

**Formal analysis:** Sylwia Bloch, Natalia Lewandowska, Joanna Zwolenkiewicz.

**Funding acquisition:** Mikołaj Olejniczak, Logan W. Donaldson, Grzegorz Węgrzyn, Bożena Nejman-Faleńczyk.

**Investigation:** Sylwia Bloch, Natalia Lewandowska, Joanna Zwolenkiewicz, Paulina Mach, Aleksandra Łukasiak, Bożena Nejman-Faleńczyk.

**Methodology:** Sylwia Bloch, Natalia Lewandowska, Joanna Zwolenkiewicz, Aleksandra Łukasiak, Mikołaj Olejniczak, Logan W. Donaldson, Bożena Nejman-Faleńczyk.

**Project administration:** Bożena Nejman-Faleńczyk.

**Supervision:** Sylwia Bloch, Mikołaj Olejniczak, Logan W. Donaldson, Grzegorz Węgrzyn, Bożena Nejman-Faleńczyk.

**Validation:** Natalia Lewandowska.

**Visualization:** Sylwia Bloch, Natalia Lewandowska, Joanna Zwolenkiewicz, Paulina Mach, Bożena Nejman-Faleńczyk.

**Writing – original draft:** Sylwia Bloch, Natalia Lewandowska, Joanna Zwolenkiewicz, Mikołaj Olejniczak, Logan W. Donaldson, Grzegorz Węgrzyn, Bożena Nejman-Faleńczyk.

**Writing – review & editing:** Bożena Nejman-Faleńczyk.

## References

1. Besser RE, Griffin PM, Slutsker L. *Escherichia coli* O157:H7 gastroenteritis and the hemolytic uremic syndrome: an emerging infectious disease. *Annu Rev Med.* 1999; 50: 355–367. <https://doi.org/10.1146/annurev.med.50.1.355> PMID: 10073283
2. Schmidt H. Shiga-toxin-converting bacteriophages. *Res Microbiol.* 2001; 152: 687–695. [https://doi.org/10.1016/s0923-2508\(01\)01249-9](https://doi.org/10.1016/s0923-2508(01)01249-9) PMID: 11686382
3. Węgrzyn G, Węgrzyn A. Genetic switches during bacteriophage lambda development. *Prog Nucleic Acid Res Mol Biol.* 2005; 79: 1–48. [https://doi.org/10.1016/S0079-6603\(04\)79001-7](https://doi.org/10.1016/S0079-6603(04)79001-7) PMID: 16096026
4. Ptashne M. *A Genetic Switch: Phage Lambda Revisited*. 3rd ed. Cold Spring Harbor (New York): Cold Spring Harbor Laboratory Press; 2004.
5. Kimmitt PT, Harwood CR, Barer MR. Induction of type 2 Shiga toxin synthesis in *Escherichia coli* O157 by 4-quinolones. *Lancet.* 1999; 353: 1588–1589. [https://doi.org/10.1016/s0140-6736\(99\)00621-2](https://doi.org/10.1016/s0140-6736(99)00621-2) PMID: 10334263
6. Kimmitt PT, Harwood CR, Barer MR. Toxin gene expression by shiga toxin-producing *Escherichia coli*: the role of antibiotics and the bacterial SOS response. *Emerg Infect Dis.* 2000; 6: 458–465.
7. Łoś JM, Łoś M, Węgrzyn G, Węgrzyn A. Differential efficiency of induction of various lambdoid prophages responsible for production of Shiga toxins in response to different induction agents. *Microb Pathog.* 2009; 47: 289–298. <https://doi.org/10.1016/j.micpath.2009.09.006> PMID: 19761828



8. Łoś JM, Łoś M, Węgrzyn A, Węgrzyn G. Hydrogen peroxide-mediated induction of the Shiga toxin-converting lambdoid prophage ST2-8624 in *Escherichia coli* O157:H7. *FEMS Immunol Med Microbiol*. 2010; 58: 322–329. <https://doi.org/10.1111/j.1574-695X.2009.00644.x> PMID: 20070366
9. Wagner PL, Acheson DW, Waldor MK. Human neutrophils and their products induce Shiga toxin production by enterohemorrhagic *Escherichia coli*. *Infect Immun*. 2001; 69: 1934–1937. <https://doi.org/10.1128/IAI.69.3.1934-1937.2001>
10. Nejman B, Łoś JM, Łoś M, Węgrzyn A, Węgrzyn G. Plasmids derived from lambdoid bacteriophages as models for studying replication of mobile genetic elements responsible for the production of Shiga toxins by pathogenic *Escherichia coli* strains. *J Mol Microbiol Biotechnol*. 2009; 17: 211–220. <https://doi.org/10.1159/000242447> PMID: 19797917
11. Nejman B, Nadratowska-Wesołowska B, Szalewska-Pałasz A, Węgrzyn A, Węgrzyn G. Replication of plasmids derived from Shiga toxin-converting bacteriophages in starved *Escherichia coli*. *Microbiology (Reading)*. 2011; 157: 220–233. <https://doi.org/10.1099/mic.0.042820-0>
12. Wagner PL, Livny J, Neely MN, Acheson DWK, Friedman DI, Waldor MK. Bacteriophage control of Shiga toxin 1 production and release by *Escherichia coli*. *Mol Microbiol*. 2002; 44: 957–970. <https://doi.org/10.1046/j.1365-2958.2002.02950.x> PMID: 12010491
13. Waldor MK, Friedman DI. Phage regulatory circuits and virulence gene expression. *Curr Opin Microbiol*. 2005; 8: 459–465. <https://doi.org/10.1016/j.mib.2005.06.001> PMID: 15979389
14. Gyles CL. Shiga toxin-producing *Escherichia coli*: an overview. *J Anim Sci*. 2007; 85: E45–62. <https://doi.org/10.2527/jas.2006-508> PMID: 17085726
15. Griffin PM, Tauxe RV. The epidemiology of infections caused by *Escherichia coli* O157:H7, other enterohemorrhagic *E. coli*, and the associated hemolytic uremic syndrome. *Epidemiol Rev*. 1991; 13: 60–98. <https://doi.org/10.1093/oxfordjournals.epirev.a036079> PMID: 1765120
16. Serna A, Boedeker EC. Pathogenesis and treatment of Shiga toxin-producing *Escherichia coli* infections. *Curr Opin Gastroenterol*. 2008; 24: 38–47. <https://doi.org/10.1097/MOG.0b013e3282f2dfb8> PMID: 18043231
17. Kakoullis L, Papachristodoulou E, Chra P, Panos G. Shiga toxin-induced haemolytic uraemic syndrome and the role of antibiotics: a global overview. *J Infect*. 2019; 79: 75–94. <https://doi.org/10.1016/j.jinf.2019.05.018> PMID: 31150744
18. Zhang X, McDaniel AD, Wolf LE, Keusch GT, Waldor MK, Acheson DW. Quinolone antibiotics induce Shiga toxin-encoding bacteriophages, toxin production, and death in mice. *J Infect Dis*. 2000; 181: 664–670. <https://doi.org/10.1086/315239> PMID: 10669353
19. Węgrzyn G, Licznarska K, Węgrzyn A. Phage λ—new insights into regulatory circuits. *Adv Virus Res*. 2012; 82: 155–178. <https://doi.org/10.1016/B978-0-12-394621-8.00016-9>
20. Liao SM, Wu TH, Chiang CH, Susskind MM, McClure WR. Control of gene expression in bacteriophage P22 by a small antisense RNA. I. Characterization in vitro of the Psar promoter and the sar RNA transcript. *Genes Dev*. 1987; 1: 197–203. <https://doi.org/10.1101/gad.1.2.197> PMID: 2445626
21. Schaefer KL, McClure WR. Antisense RNA control of gene expression in bacteriophage P22. I. Structures of sar RNA and its target, ant mRNA. *RNA*. 1997; 3: 141–156. PMID: 9042942
22. Ravin NV, Svarchevsky AN, Dehò G. The anti-immunity system of phage-plasmid N15: identification of the antirepressor gene and its control by a small processed RNA. *Mol Microbiol*. 1999; 34: 980–994. <https://doi.org/10.1046/j.1365-2958.1999.01658.x> PMID: 10594823
23. Nejman-Faleńczyk B, Bloch S, Licznarska K, Dydecka A, Felczykowska A, Topka G, et al. A small, microRNA-size, ribonucleic acid regulating gene expression and development of Shiga toxin-converting bacteriophage Φ24<sub>B</sub>. *Sci Rep*. 2015; 5: 10080. <https://doi.org/10.1038/srep10080> PMID: 25962117
24. Allison HE, Sergeant MJ, James CE, Saunders JR, Smith DL, Sharp RJ, et al. Immunity Profiles of Wild-Type and Recombinant Shiga-Like Toxin-Encoding Bacteriophages and Characterization of Novel Double Lysogens. *Infect Immun*. 2003; 71: 3409–3418. <https://doi.org/10.1128/IAI.71.6.3409-3418.2003> PMID: 12761125
25. Jensen KF. The *Escherichia coli* K-12 “wild types” W3110 and MG1655 have an *rph* frameshift mutation that leads to pyrimidine starvation due to low *pyrE* expression levels. *J Bacteriol*. 1993; 175: 3401–3407. <https://doi.org/10.1128/jb.175.11.3401-3407.1993>
26. Bloch S, Nejman-Faleńczyk B, Łoś JM, Barańska S, Łepk K, Felczykowska A, et al. Genes from the *exo-xis* region of λ and Shiga toxin-converting bacteriophages influence lysogenization and prophage induction. *Arch Microbiol*. 2013; 195: 693–703. <https://doi.org/10.1007/s00203-013-0920-8> PMID: 23979561
27. Łoś JM, Golec P, Węgrzyn G, Węgrzyn A, Łoś M. Simple method for plating *Escherichia coli* bacteriophages forming very small plaques or no plaques under standard conditions. *Appl Environ Microbiol*. 2008; 74: 5113–5120. <https://doi.org/10.1128/AEM.00306-08> PMID: 18586961



28. Dydecka A, Bloch S, Rizvi A, Perez S, Nejman-Faleńczyk B, Topka G, et al. Bad Phages in Good Bacteria: Role of the Mysterious *orf63* of  $\lambda$  and Shiga Toxin-Converting  $\Phi 24_B$  Bacteriophages. *Front Microbiol.* 2017; 8: 1618. <https://doi.org/10.3389/fmicb.2017.01618> PMID: 28890713
29. Bloch S, Nejman-Faleńczyk B, Dydecka A, Łoś JM, Felczykowska A, Węgrzyn A, et al. Different Expression Patterns of Genes from the *exo-xis* Region of Bacteriophage  $\lambda$  and Shiga Toxin-Converting Bacteriophage  $\Phi 24_B$  following Infection or Prophage Induction in *Escherichia coli*. *PLOS ONE.* 2014; 9: e108233. <https://doi.org/10.1371/journal.pone.0108233> PMID: 25310402
30. Czajkowski R, Ozymko Z, Lojkowska E. Isolation and characterization of novel soilborne lytic bacteriophages infecting *Dickeya* spp. biovar 3 ('*D. solani*'). *Plant Pathology.* 2014; 63: 758–772. <https://doi.org/10.1111/ppa.12157>
31. Strauch E, Hammerl JA, Konietzny A, Schneiker-Bekel S, Arnold W, Goesmann A, et al. Bacteriophage 2851 is a prototype phage for dissemination of the Shiga toxin variant gene 2c in *Escherichia coli* O157: H7. *Infect Immun.* 2008; 76: 5466–5477. <https://doi.org/10.1128/IAI.00875-08> PMID: 18824528
32. Zhao X, Shen M, Jiang X, Shen W, Zhong Q, Yang Y, et al. Transcriptomic and Metabolomics Profiling of Phage–Host Interactions between Phage PaP1 and *Pseudomonas aeruginosa*. *Frontiers in Microbiology.* 2017;8
33. Delaglio F, Grzesiek S, Vuister GW, Zhu G, Pfeifer J, Bax A. NMRPipe: a multidimensional spectral processing system based on UNIX pipes. *J Biomol NMR.* 1995; 6: 277–293. <https://doi.org/10.1007/BF00197809> PMID: 8520220
34. Stein EM, Kwiatkowska J, Basczok MM, Gravel CM, Berry KE, Olejniczak M. Determinants of RNA recognition by the FinO domain of the *Escherichia coli* ProQ protein. *Nucleic Acids Res.* 2020; 48: 7502–7519. <https://doi.org/10.1093/nar/gkaa497> PMID: 32542384
35. Małecka EM, Stróżecka J, Sobańska D, Olejniczak M. Structure of bacterial regulatory RNAs determines their performance in competition for the chaperone protein Hfq. *Biochemistry.* 2015; 54: 1157–1170. <https://doi.org/10.1021/bi500741d> PMID: 25582129
36. Mann M, Wright PR, Backofen R. IntaRNA 2.0: enhanced and customizable prediction of RNA-RNA interactions. *Nucleic Acids Res.* 2017; 45: W435–W439. <https://doi.org/10.1093/nar/gkx279> PMID: 28472523
37. Reuter JS, Mathews DH. RNAstructure: software for RNA secondary structure prediction and analysis. *BMC Bioinformatics.* 2010; 11: 129. <https://doi.org/10.1186/1471-2105-11-129> PMID: 20230624
38. Vogel J, Luisi BF. Hfq and its constellation of RNA. *Nat Rev Microbiol.* 2011; 9: 578–589. <https://doi.org/10.1038/nrmicro2615> PMID: 21760622
39. Quendera AP, Seixas AF, Dos Santos RF, Santos I, Silva JPN, Arraiano CM, et al. RNA-Binding Proteins Driving the Regulatory Activity of Small Non-coding RNAs in Bacteria. *Front Mol Biosci.* 2020; 7: 78. <https://doi.org/10.3389/fmolb.2020.00078> PMID: 32478092
40. Wagner EGH, Romby P. Small RNAs in bacteria and archaea: who they are, what they do, and how they do it. *Adv Genet.* 2015; 90: 133–208. <https://doi.org/10.1016/bs.adgen.2015.05.001> PMID: 26296935
41. Altuvia S, Storz G, Papenfort K. Cross-regulation between bacteria and phages at a post-transcriptional level. *Microbiol Spectr.* 2018; 6: 10.1128/microbiolspec.RWR-0027–2018. <https://doi.org/10.1128/microbiolspec.RWR-0027-2018> PMID: 30006994
42. Bloch S, Węgrzyn A, Węgrzyn G, Nejman-Faleńczyk B. Small and Smaller—sRNAs and MicroRNAs in the Regulation of Toxin Gene Expression in Prokaryotic Cells: A Mini-Review. *Toxins (Basel).* 2017; 9: 181. <https://doi.org/10.3390/toxins9060181> PMID: 28556797
43. Bloch S, Lewandowska N, Węgrzyn G, Nejman-Faleńczyk B. Bacteriophages as sources of small non-coding RNA molecules. *Plasmid.* 2021; 113: 102527. <https://doi.org/10.1016/j.plasmid.2020.102527> PMID: 32768406
44. Nukui M, Mori Y, Murphy EA. A Human Herpesvirus 6A-Encoded MicroRNA: Role in Viral Lytic Replication. *J Virol.* 2014; 89: 2615–2627. <https://doi.org/10.1128/JVI.02007-14> PMID: 25520507
45. Dass D, Dhotre K, Chakraborty M, Nath A, Banerjee A, Bagchi P, et al. miRNAs in Herpesvirus Infection: Powerful Regulators in Small Packages. *Viruses.* 2023; 15: 429. <https://doi.org/10.3390/v15020429> PMID: 36851643
46. Speck SH, Ganem D. Viral latency and its regulation: lessons from the gamma-herpesviruses. *Cell Host Microbe.* 2010; 8: 100–115. <https://doi.org/10.1016/j.chom.2010.06.014> PMID: 20638646
47. Kavita DrK, Mets F, Gottesman S. New aspects of RNA-based regulation by Hfq and its partner sRNAs. *Current opinion in microbiology.* 2017; 42: 53–61. <https://doi.org/10.1016/j.mib.2017.10.014> PMID: 29125938
48. Ishikawa H, Otaka H, Maki K, Morita T, Aiba H. The functional Hfq-binding module of bacterial sRNAs consists of a double or single hairpin preceded by a U-rich sequence and followed by a 3' poly(U) tail. *RNA.* 2012; 18: 1062–1074. <https://doi.org/10.1261/ma.031575.111> PMID: 22454537

49. Chipman LB, Pasquinelli AE. miRNA Targeting: Growing beyond the Seed. *Trends Genet.* 2019; 35: 215–222. <https://doi.org/10.1016/j.tig.2018.12.005> PMID: 30638669
50. Chen S, Deng Y, Pan D. MicroRNA Regulation of Human Herpesvirus Latency. *Viruses.* 2022; 14: 1215. <https://doi.org/10.3390/v14061215> PMID: 35746686
51. Steer B, Strehle M, Sattler C, Bund D, Flach B, Stoeger T, et al. The small noncoding RNAs (sncRNAs) of murine gammaherpesvirus 68 (MHV-68) are involved in regulating the latent-to-lytic switch *in vivo*. *Sci Rep.* 2016; 6: 32128. <https://doi.org/10.1038/srep32128> PMID: 27561205
52. Plaisance-Bonstaff K, Choi HS, Beals T, Krueger BJ, Boss IW, Gay LA, et al. KSHV miRNAs Decrease Expression of Lytic Genes in Latently Infected PEL and Endothelial Cells by Targeting Host Transcription Factors. *Viruses.* 2014; 6: 4005–4023. <https://doi.org/10.3390/v6104005> PMID: 25341664
53. Kim H, Iizasa H, Kanehiro Y, Fekadu S, Yoshiyama H. Herpesviral microRNAs in Cellular Metabolism and Immune Responses. *Frontiers in Microbiology.* 2017;8
54. Kincaid RP, Sullivan CS. Virus-Encoded microRNAs: An Overview and a Look to the Future. *PLOS Pathogens.* 2012; 8: e1003018. <https://doi.org/10.1371/journal.ppat.1003018> PMID: 23308061
55. Ye Y, Zhou Y, Zhang L, Chen Y, Lyu X, Cai L, et al. EBV-miR-BART1 is involved in regulating metabolism-associated genes in nasopharyngeal carcinoma. *Biochem Biophys Res Commun.* 2013; 436: 19–24. <https://doi.org/10.1016/j.bbrc.2013.05.008> PMID: 23685147
56. DeBerardinis RJ. Serine metabolism: some tumors take the road less traveled. *Cell Metab.* 2011; 14: 285–286. <https://doi.org/10.1016/j.cmet.2011.08.004> PMID: 21907134
57. Yogev O, Lagos D, Enver T, Boshoff C. Kaposi's Sarcoma Herpesvirus MicroRNAs Induce Metabolic Transformation of Infected Cells. *PLOS Pathogens.* 2014; 10: e1004400. <https://doi.org/10.1371/journal.ppat.1004400> PMID: 25255370
58. Vander Heiden MG, Cantley LC, Thompson CB. Understanding the Warburg Effect: The Metabolic Requirements of Cell Proliferation. *Science.* 2009; 324: 1029–1033. <https://doi.org/10.1126/science.1160809> PMID: 19460998
59. Alfarouk KO. Tumor metabolism, cancer cell transporters, and microenvironmental resistance. *J Enzyme Inhib Med Chem.* 2016; 31: 859–866. <https://doi.org/10.3109/14756366.2016.1140753> PMID: 26864256
60. Saskó E, Hujber Z, Nyíró G, Likó I, Mátyási B, Petővári G, et al. The SDHB Arg230His mutation causing familial paraganglioma alters glycolysis in a new *Caenorhabditis elegans* model. *Dis Model Mech.* 2020; 13: dmm044925. <https://doi.org/10.1242/dmm.044925> PMID: 32859697
61. Casas-Benito A, Martínez-Herrero S, Martínez A. Succinate-Directed Approaches for Warburg Effect-Targeted Cancer Management, an Alternative to Current Treatments? *Cancers (Basel).* 2023; 15: 2862. <https://doi.org/10.3390/cancers15102862> PMID: 37345199
62. Lee C-H, Gundem G, Lee W, Chen Y-B, Cross JR, Dong Y, et al. Persistent Severe Hyperlactatemia and Metabolic Derangement in Lethal *SDHB*-Mutated Metastatic Kidney Cancer: Clinical Challenges and Examples of Extreme Warburg Effect. *JCO Precis Oncol.* 2017; 1: PO.16.00007. <https://doi.org/10.1200/PO.16.00007> PMID: 35172488
63. Eijkelenkamp K, Osinga TE, Links TP, van der Horst-Schrivers ANA. Clinical implications of the onco-metabolite succinate in SDHx-mutation carriers. *Clinical Genetics.* 2020; 97: 39–53. <https://doi.org/10.1111/cge.13553> PMID: 30977114
64. Holt GS, Lodge JK, McCarthy AJ, Graham AK, Young G, Bridge SH, et al. Shigatoxin encoding Bacteriophage  $\phi$ 24<sub>B</sub> modulates bacterial metabolism to raise antimicrobial tolerance. *Sci Rep.* 2017; 7: 40424. <https://doi.org/10.1038/srep40424> PMID: 28106081
65. Howard-Varona C, Lindback MM, Bastien GE, Solonenko N, Zayed AA, Jang H, et al. Phage-specific metabolic reprogramming of virocells. *ISME J.* 2020; 14: 881–895. <https://doi.org/10.1038/s41396-019-0580-z> PMID: 31896786
66. Silveira CB, Luque A, Rohwer F. The landscape of lysogeny across microbial community density, diversity and energetics. *Environ Microbiol.* 2021; 23: 4098–4111. <https://doi.org/10.1111/1462-2920.15640> PMID: 34121301
67. Grodzicker T, Arditti RR, Eisen H. Establishment of repression by lambdoid phage in catabolite activator protein and adenylate cyclase mutants of *Escherichia coli*. *Proc Natl Acad Sci U S A.* 1972; 69: 366–370. <https://doi.org/10.1073/pnas.69.2.366> PMID: 4333980
68. Cheng HH, Muhlrad PJ, Hoyt MA, Echols H. Cleavage of the cII protein of phage lambda by purified HflA protease: control of the switch between lysis and lysogeny. *Proc Natl Acad Sci U S A.* 1988; 85: 7882–7886. <https://doi.org/10.1073/pnas.85.21.7882> PMID: 2973057
69. Golding I, Coleman S, Nguyen TVP, Yao T. Decision Making by Temperate Phages. *Encyclopedia of Virology.* Elsevier; 2020. pp. 88–97. <https://doi.org/10.1016/B978-0-12-809633-8.20969-2>
